# Supplementary material for: Structure Revision of Penipacids A–E Reveals a Putative New Cryptic Natural Product, N-aminoanthranilic Acid, with Potential as a Transcriptional Regulator of Silent Secondary Metabolism
Source: MDPI journal article supplement (doi:10.3390/md20060339), 2022-05-24
Supplement: s1 [file s1]

## Supplementary Material

**Structure revision of penipacids A–E reveals a putative new cryptic natural product, *N*-aminoanthranilic acid, with potential as a transcriptional regulator of silent secondary metabolism.**

Zeinab G. Khalil<sup>†</sup>, Sarani Kankanamge<sup>†</sup> and Robert J. Capon \*

Institute for Molecular Bioscience, The University of Queensland, St Lucia, QLD, Australia;  
[z.khalil@uq.edu.au](mailto:z.khalil@uq.edu.au) (Z.G.K)

Institute for Molecular Bioscience, The University of Queensland, St Lucia, QLD, Australia;  
[s.kankanamge@imb.uq.edu.au](mailto:s.kankanamge@imb.uq.edu.au) (S.D.R)

<sup>†</sup>These authors contributed equally

\* Correspondence: [r.capon@uq.edu.au](mailto:r.capon@uq.edu.au) (R.J.C.); Tel.: +61 7 3346 2979

## **Table of contents**

|     |                                                                  |    |
|-----|------------------------------------------------------------------|----|
| 1   | General experimental details .....                               | 4  |
| 2   | Synthesis of anthranilic acid.....                               | 5  |
| 3   | Synthesis of <i>N</i> -aminoanthranilic acid ( <b>11</b> ) ..... | 8  |
| 4   | Synthesis of penipacid A ( <b>6</b> ) .....                      | 11 |
| 5   | Synthesis of penipacid B ( <b>7</b> ).....                       | 14 |
| 6   | Synthesis of penipacid C ( <b>8</b> ).....                       | 17 |
| 7   | Synthesis of penipacid D ( <b>9</b> ) .....                      | 20 |
| 8   | Synthesis of penipacid E ( <b>10</b> ).....                      | 23 |
| 9   | Biological assays .....                                          | 25 |
| 9.1 | Antibacterial and antifungal assays .....                        | 25 |
| 9.2 | Cytotoxicity (MTT) assay .....                                   | 25 |
| 10  | References .....                                                 | 27 |

## **List of Figures**

|                                                                                                                                      |    |
|--------------------------------------------------------------------------------------------------------------------------------------|----|
| Figure S1. HPLC-DAD-MS chromatogram for the reaction mixture of anthranilic acid.....                                                | 6  |
| Figure S2. <sup>1</sup> H NMR (600 MHz, DMSO- <i>d</i> <sub>6</sub> ) spectrum of anthranilic acid .....                             | 7  |
| Figure S3. <sup>13</sup> C (150 MHz, DMSO- <i>d</i> <sub>6</sub> ) spectrum of anthranilic acid .....                                | 7  |
| Figure S4. HPLC-DAD-MS chromatogram for the reaction mixture of <i>N</i> -aminoanthranilic acid.....                                 | 8  |
| Figure S5. <sup>1</sup> H NMR (600 MHz, DMSO- <i>d</i> <sub>6</sub> ) spectrum of <i>N</i> -aminoanthranilic acid ( <b>11</b> )..... | 9  |
| Figure S6. <sup>13</sup> C (150 MHz, DMSO- <i>d</i> <sub>6</sub> ) spectrum of <i>N</i> -aminoanthranilic acid ( <b>11</b> ).....    | 9  |
| Figure S7. HRMS for <i>N</i> -aminoanthranilic acid ( <b>11</b> ).....                                                               | 10 |
| Figure S8. HPLC-DAD chromatogram for the purified penipacid A .....                                                                  | 11 |
| Figure S9. <sup>1</sup> H NMR (600 MHz, CDCl <sub>3</sub> ) for penipacid A ( <b>6</b> ) .....                                       | 12 |
| Figure S10. <sup>13</sup> C (150 MHz, CDCl <sub>3</sub> ) spectrum for penipacid A ( <b>6</b> ) .....                                | 12 |
| Figure S11. HRMS for penipacid A ( <b>6</b> ) .....                                                                                  | 13 |
| Figure S12. HPLC-DAD (210 nm) chromatogram for the purified penipacid B.....                                                         | 14 |
| Figure S13. <sup>1</sup> H NMR (600 MHz, methanol- <i>d</i> <sub>4</sub> ) for penipacid B ( <b>7</b> ) .....                        | 15 |
| Figure S14. <sup>13</sup> C (150 MHz, methanol- <i>d</i> <sub>4</sub> ) spectrum for penipacid B ( <b>7</b> ).....                   | 15 |
| Figure S15. HRMS for penipacid B ( <b>7</b> ).....                                                                                   | 16 |
| Figure S16. HPLC-DAD chromatogram for the purified penipacid C.....                                                                  | 17 |
| Figure S17. <sup>1</sup> H NMR (600 MHz, DMSO- <i>d</i> <sub>6</sub> ) for penipacid C ( <b>8</b> ).....                             | 18 |
| Figure S18. <sup>13</sup> C (150 MHz, DMSO- <i>d</i> <sub>6</sub> ) for penipacid C ( <b>8</b> ).....                                | 18 |
| Figure S19. HRMS for penipacid C ( <b>8</b> ).....                                                                                   | 19 |
| Figure S20. HPLC-DAD chromatogram for the purified penipacid D .....                                                                 | 20 |
| Figure S21. <sup>1</sup> H NMR (600 MHz, methanol- <i>d</i> <sub>4</sub> ) for penipacid D ( <b>9</b> ).....                         | 21 |
| Figure S22. <sup>13</sup> C (150 MHz, methanol- <i>d</i> <sub>4</sub> ) for penipacid D ( <b>9</b> ) .....                           | 21 |
| Figure S23. HRMS for penipacid D ( <b>9</b> ) .....                                                                                  | 22 |
| Figure S24. HPLC-DAD chromatogram for the reaction mixture of penipacid E.....                                                       | 23 |
| Figure S25. HRMS for penipacid E ( <b>10</b> ).....                                                                                  | 24 |
| Figure S26. Growth inhibitory activity of <i>N</i> -aminoanthranilic acid .....                                                      | 25 |
| Figure S27. Cytotoxicity of <i>N</i> -aminoanthranilic acid against SW620 and NCIH-460. ....                                         | 25 |

## **List of Tables**

|                                                                                                      |    |
|------------------------------------------------------------------------------------------------------|----|
| Table S1. 1D NMR (600 MHz, CDCl <sub>3</sub> ) data for penipacid A ( <b>6</b> ).....                | 11 |
| Table S2. 1D NMR (600 MHz, methanol- <i>d</i> <sub>4</sub> ) data for penipacid B ( <b>7</b> ) ..... | 14 |
| Table S3. 1D NMR (600 MHz, DMSO- <i>d</i> <sub>6</sub> ) data for penipacid C ( <b>8</b> ).....      | 17 |
| Table S4. 1D NMR (600 MHz, methanol- <i>d</i> <sub>4</sub> ) data for penipacid D ( <b>9</b> ).....  | 20 |
| Table S5. List of bacterial strains for the activation trials.....                                   | 26 |
| Table S6. List of fungal strains for the activation trials .....                                     | 26 |

## **List of Schemes**

|                                                                                              |    |
|----------------------------------------------------------------------------------------------|----|
| Scheme S1. Synthesis of anthranilic acid.....                                                | 5  |
| Scheme S2. Synthesis of <i>N</i> -aminoanthranilic acid from anthranilic acid. ....          | 8  |
| Scheme S3. Synthesis of penipacid A ( <b>6</b> ) from <i>N</i> -aminoanthranilic acid.....   | 11 |
| Scheme S4. Synthesis of penipacid B ( <b>7</b> ) from <i>N</i> -aminoanthranilic acid .....  | 14 |
| Scheme S5. Synthesis of penipacid C ( <b>8</b> ) from <i>N</i> -aminoanthranilic acid .....  | 17 |
| Scheme S6. Synthesis of penipacid D ( <b>9</b> ) from <i>N</i> -aminoanthranilic acid.....   | 20 |
| Scheme S7. Synthesis of penipacid E ( <b>10</b> ) from <i>N</i> -aminoanthranilic acid ..... | 23 |

## 1 General experimental details

Chemicals were purchased from Sigma-Aldrich or Merck unless otherwise specified. Analytical-grade solvents were used for solvent extractions. Solvents used for HPLC, UPLC and HPLC-MS purposes were of HPLC grade supplied by Labscan or Sigma-Aldrich and filtered/degassed through 0.45  $\mu\text{m}$  polytetrafluoroethylene (PTFE) membrane prior to use. Deuterated solvents were purchased from Cambridge Isotopes (Tewksbury, MA, USA).

Semi-preparative HPLC was performed using Agilent 1100 series HPLC instruments with corresponding detectors, fraction collectors and software inclusively. Liquid chromatography-diode array-mass spectrometry (HPLC-DAD-MS) data was acquired on an Agilent 1260 Infinity II separation module equipped with an Agilent single quad MSD mass detector and diode array multiple wavelength detector using Agilent Zorbax SB-C<sub>8</sub> column (2.1  $\times$  150 mm, 3.5 mm) running 0.8 mL/min gradient elution from 90% H<sub>2</sub>O/MeCN to 100% MeCN (with constant 0.05% formic acid modifier) over 6.5 min. UPLC system equipped with diode array multiple wavelength detector (Zorbax C<sub>8</sub> RRHD 1.8  $\mu\text{m}$  column, 50  $\times$  2.1 mm, eluting with 0.417 mL/min 90% H<sub>2</sub>O/MeCN to 100% MeCN (with isocratic 0.01% TFA modifier) over 2.50 min). UHPLC-QTOF analysis was performed on UHPLC-QTOF instrument comprising an Agilent 1290 Infinity II UHPLC (Zorbax C<sub>8</sub> RRHD 1.8  $\mu\text{m}$  column, 50  $\times$  2.1 mm, eluting with 0.417 mL/min of isocratic 90% H<sub>2</sub>O/MeCN to 100% MeCN over 2.50 min (with isocratic 0.1% formic acid modifier) coupled to an Agilent 6545 Q-TOF. MS/MS analysis was performed on the same instrument for ions detected in the full scan at an intensity above 1000 counts at 10 scans/s, with an isolation width of 4  $\sim\text{m/z}$  using a fixed collision energy and a maximum of 3 selected precursors per cycle. Nuclear magnetic resonance (NMR) spectra were acquired on a Bruker Avance 600 MHz spectrometer with either a 5 mm PASEL 1H/D-13C Z-Gradient probe or 5 mm CPTCI 1H/19F-13C/15N/DZ-Gradient cryoprobe, controlled by TopSpin 2.1 software. In all cases spectra were acquired at 25  $^{\circ}\text{C}$  in DMSO-*d*<sub>6</sub> with referencing to residual <sup>1</sup>H or <sup>13</sup>C signals ( $\delta_{\text{H}}$  2.50 and  $\delta_{\text{C}}$  39.51 ppm); CDCl<sub>3</sub> with referencing to residual <sup>1</sup>H or <sup>13</sup>C signals ( $\delta_{\text{H}}$  7.24 and  $\delta_{\text{C}}$  77.23 ppm) and MeOH-*d*<sub>4</sub> with referencing to residual <sup>1</sup>H or <sup>13</sup>C signals ( $\delta_{\text{H}}$  3.31 and  $\delta_{\text{C}}$  49.15 ppm) in the deuterated solvent. High-resolution ESIMS spectra were obtained on a Bruker micrOTOF mass spectrometer by direct injection in MeOH at 3  $\mu\text{L/min}$  using sodium formate clusters as an internal calibrant.

## 2 Synthesis of anthranilic acid

Anthranilic acid was prepared by reacting Na-phthalimide with sodium hypochlorite followed by neutralization with conc. HCl. Briefly, solid NaOH (9 g) was dissolved in water (100 mL) and the reaction mixture was cooled down to 10 °C, stirred for 5 min. Phthalimide (15 g) was added to the solution and stirred for 10 min at 10 °C. Following that sodium hypochlorite (7 g) was added to the mixture and further stirred for another 15 min, after which the reaction mixture was heated to 50 °C for 15 min and then cooled down to 30 °C. Conc. HCl (30 mL) was added to neutralize the pH followed by the addition of glacial acetic acid (30 mL) dropwise. The formed crystals were obtained by filtration and washed with cold water to afford anthranilic acid in a quantitative yield as grey powder. LRMS 138 [M+H]<sup>+</sup> and 136 [M+H]<sup>-</sup>. <sup>1</sup>H NMR (600 MHz, DMSO-*d*<sub>6</sub>) δ<sub>H</sub> 7.68 (1H, dd, 7.9, 1.5), 7.19 (1H, dd, 8.4, 1.5), 6.72 (1H, dd, 8.4, 0.7), 6.48 (1H, dd, 8.4, 1.0); <sup>13</sup>C NMR (150 MHz, DMSO-*d*<sub>6</sub>) δ<sub>C</sub> 170.2, 151.8, 133.8, 131.6, 116.7, 114.9, 110.8.

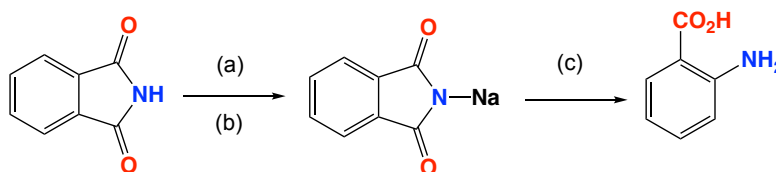

**Scheme S1.** Synthesis of anthranilic acid using (a) NaOH for 10 min at 10 °C; (b) NaClO for 15 min at 50 °C then reaction mixture was cooled to 30 °C and (c) conc. HCl for 10 min at 30 °C followed by the addition of glacial acetic acid for 5 min

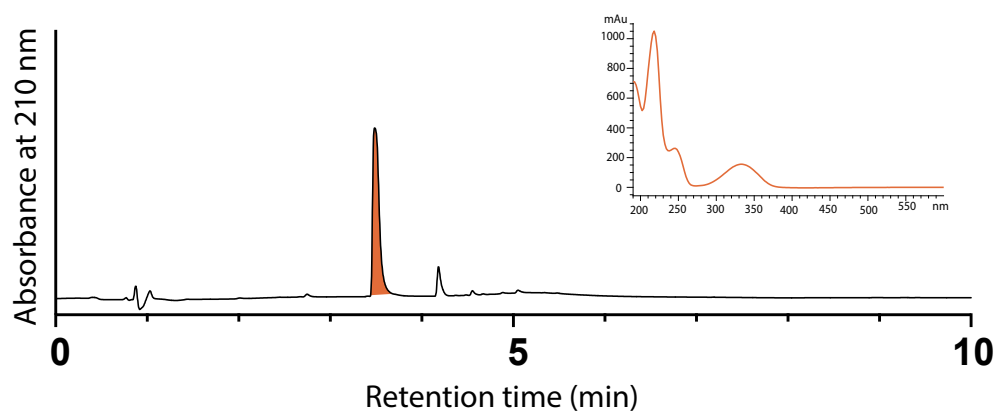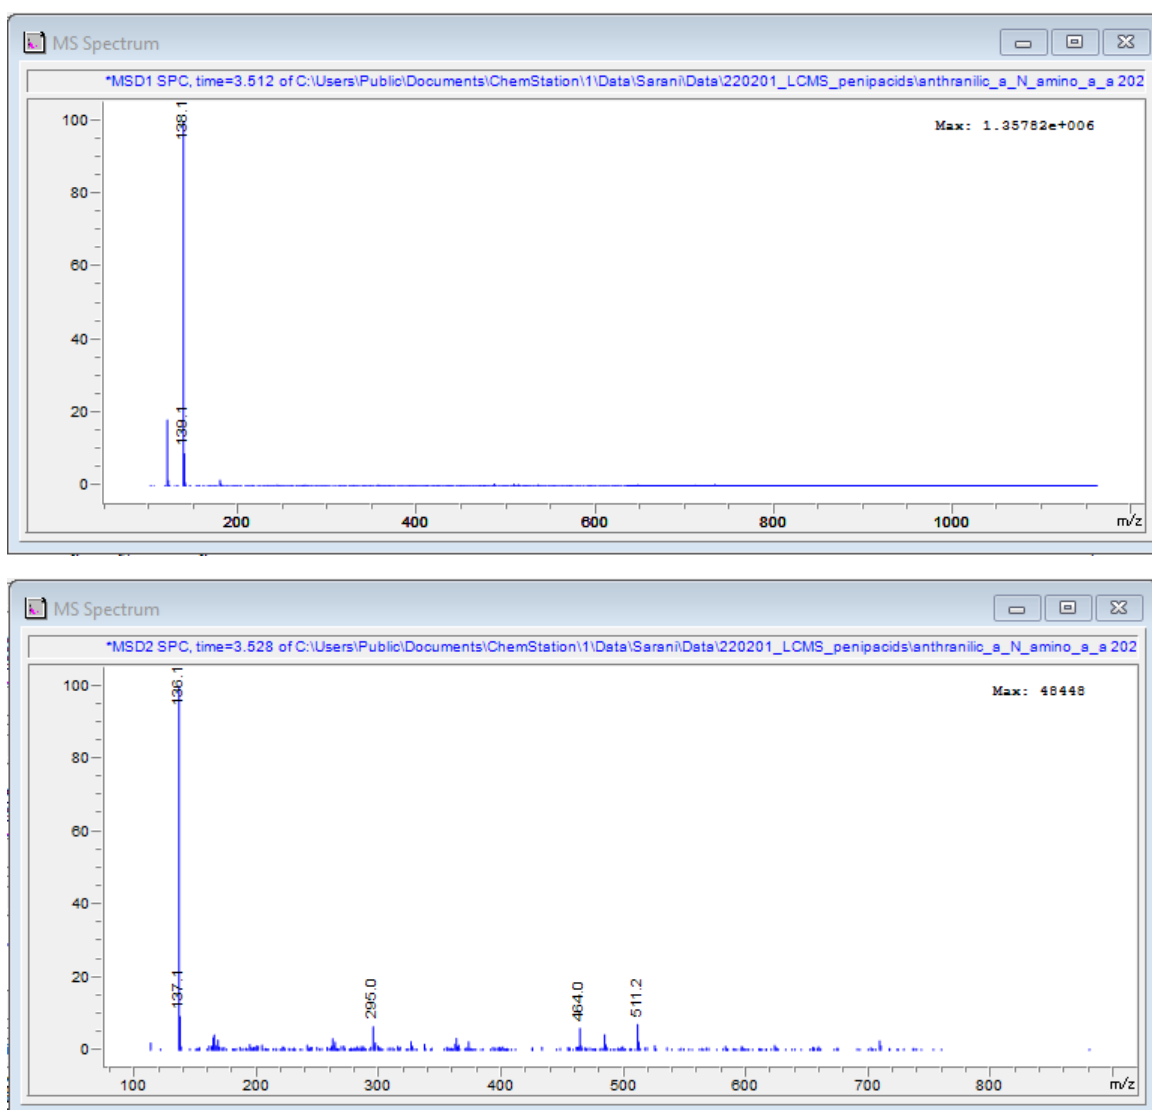

**Figure S1.** HPLC-DAD-MS (210 nm) chromatogram for the reaction mixture of anthranilic acid (highlighted peak, retention time 4.17 min) and UV vis spectrum inset using Agilent Zorbax SB-C<sub>8</sub> column (2.1 × 150 mm, 3.5 mm) running 0.8 mL/min gradient elution from 90% H<sub>2</sub>O/MeCN to 100% MeCN (with constant 0.05% formic acid modifier) over 6.5 min.

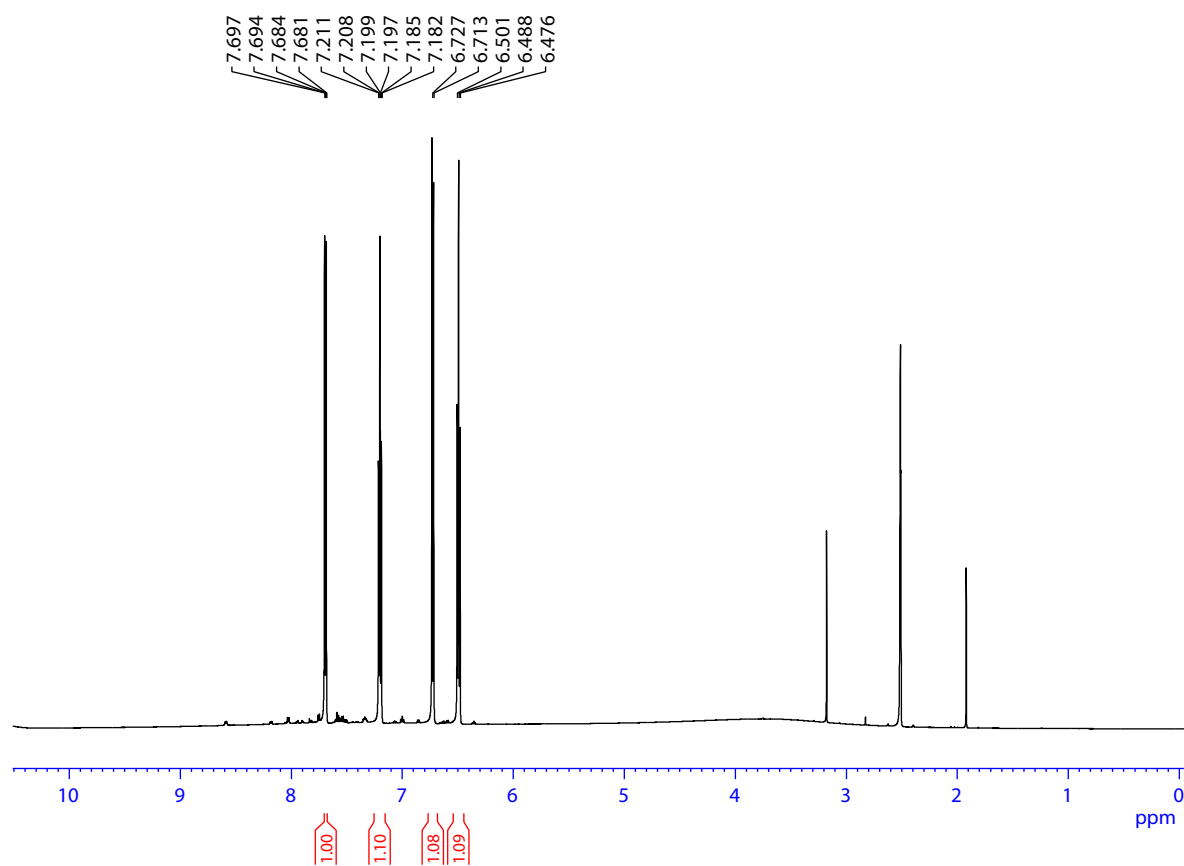

**Figure S2.**  $^1\text{H}$  NMR (600 MHz,  $\text{DMSO-}d_6$ ) spectrum of anthranilic acid

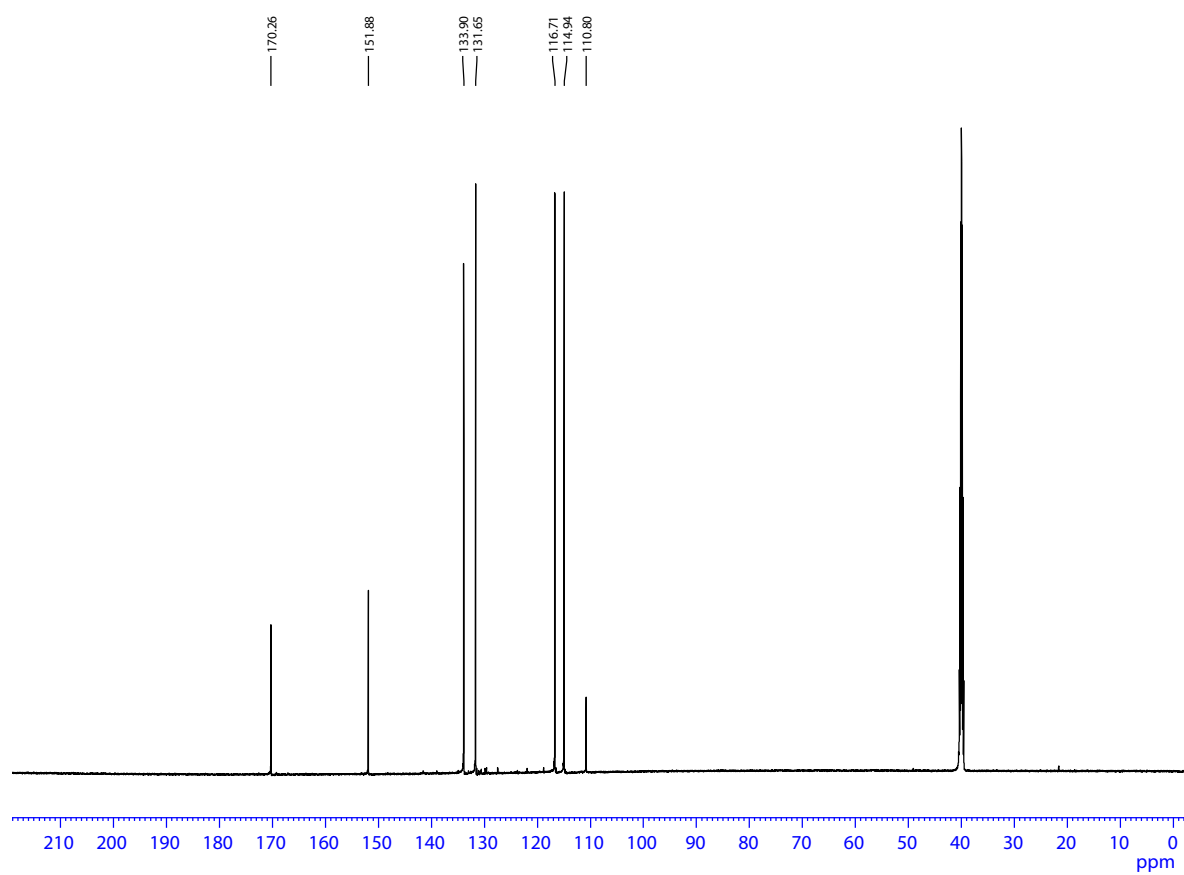

**Figure S3.**  $^{13}\text{C}$  (150 MHz,  $\text{DMSO-}d_6$ ) spectrum of anthranilic acid

### 3 Synthesis of *N*-aminoanthranilic acid (11)

The synthetic procedure was adopted from the method by Dang et al.<sup>2</sup> Anthranilic acid (274 mg, 2 mmol) was dissolved in 6M HCl (4.8 mL) and the reaction mixture was cooled down to 0 °C in ice and stirred for 10 min, followed by dropwise addition of a solution of NaNO<sub>2</sub> (152 mg, 2.3 mmol) in water (0.8 mL). The reaction mixture was stirred for 1 h at 0 °C, then the solution of SnCl<sub>2</sub>·2H<sub>2</sub>O (903 mg, 4 mmol) in 6M HCl (1.2 mL) was added. The ice bath was removed, and the reaction mixture was stirred for another 1 h at room temperature and then set-aside in the cold room for 2 h at 4 °C. The formed precipitate was filtered under vacuum, washed 3 times with ice cold water to yield *N*-aminoanthranilic acid (173 mg, 57% yield, *R<sub>f</sub>* 0.42 in 10% MeOH/DCM, the spot was visualized by UV at 254 nm). HRESI(+)MS calculated for C<sub>7</sub>H<sub>9</sub>N<sub>2</sub>O<sub>2</sub> 153.0659, found 153.0657. <sup>1</sup>H NMR (600 MHz, DMSO-*d*<sub>6</sub>) δ<sub>H</sub> 10.50 (1H, br s), 9.08 (1H, br s), 7.93 (1H, d, 7.7), 7.58 (1H, dd, 8.2, 1.1), 7.12 (1H, d, 8.2), 6.97 (1H, dd, 8.2, 7.7); <sup>13</sup>C NMR (150 MHz, DMSO-*d*<sub>6</sub>) δ<sub>C</sub> 169.3, 148.3, 134.7, 131.8, 120.1, 114.1, 113.9.

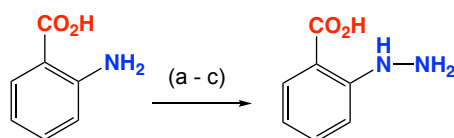

**Scheme S2.** Synthesis of *N*-aminoanthranilic acid from anthranilic acid. (a) 6M HCl, (b) NaNO<sub>2</sub> and (c) SnCl<sub>2</sub>·2H<sub>2</sub>O

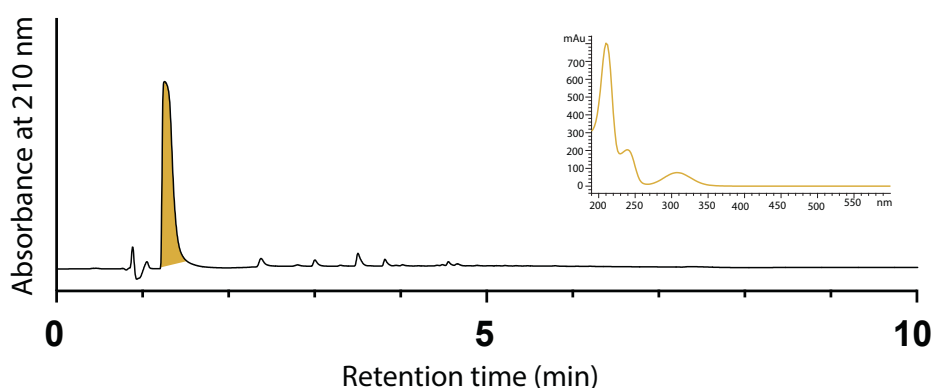

**Figure S4.** HPLC-DAD-MS (210 nm) chromatogram for the reaction mixture of *N*-aminoanthranilic acid (highlighted peak, retention time 4.17 min) and UV vis spectrum inset using Agilent Zorbax SB-C<sub>8</sub> column (2.1 × 150 mm, 3.5 mm) running 0.8 mL/min gradient elution from 90% H<sub>2</sub>O/MeCN to 100% MeCN (with constant 0.05% formic acid modifier) over 6.5 min



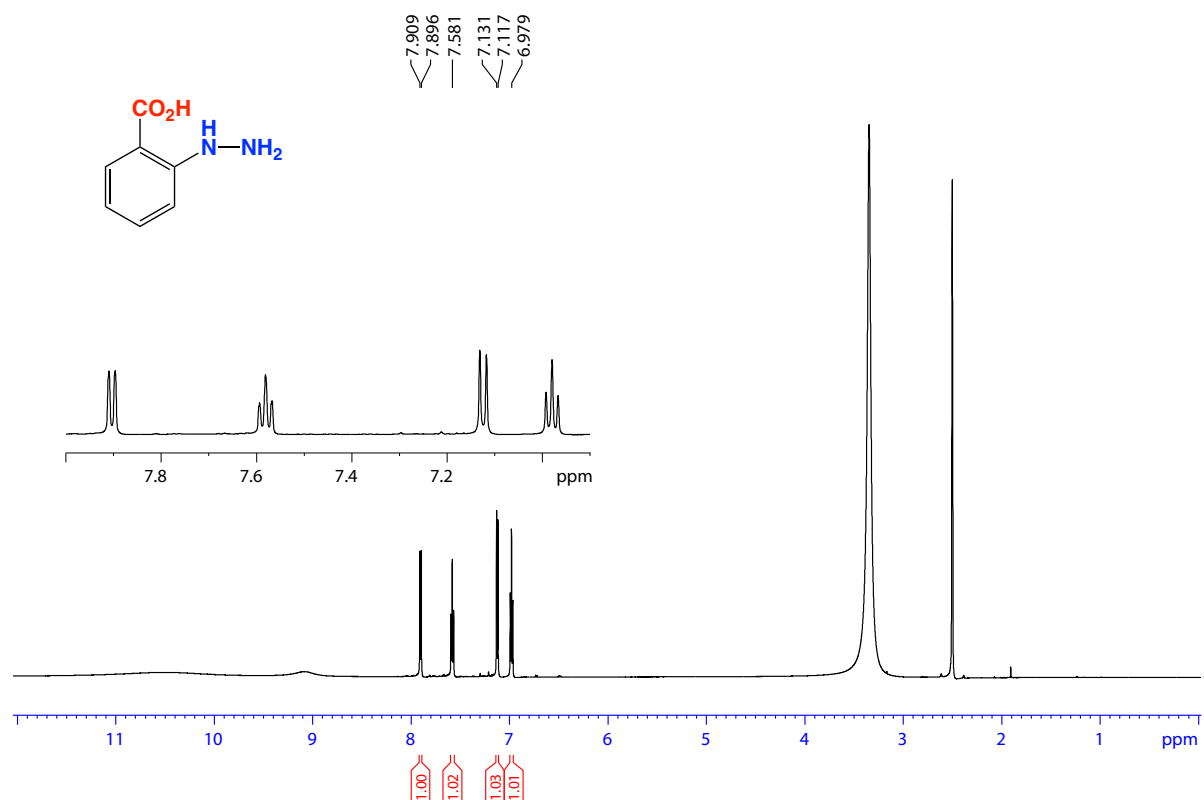

**Figure S5.** <sup>1</sup>H NMR (600 MHz, DMSO-*d*<sub>6</sub>) spectrum of *N*-aminoanthranilic acid (**11**)

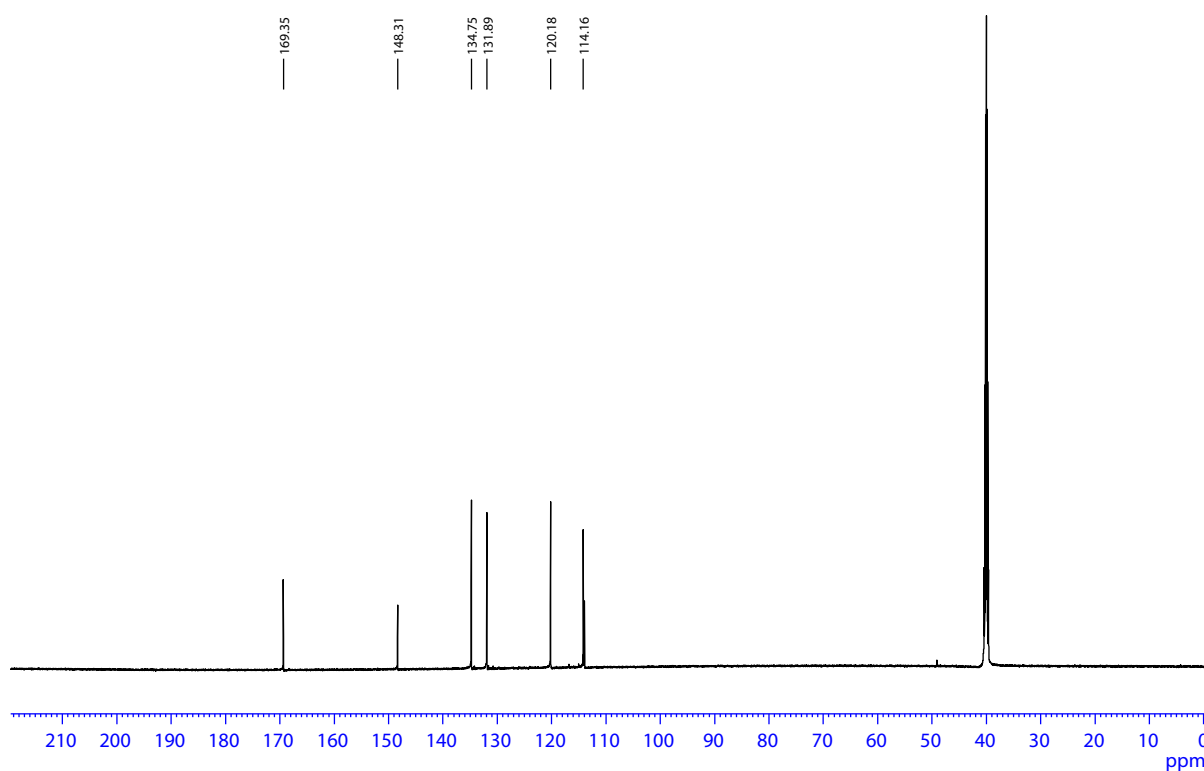

**Figure S6.** <sup>13</sup>C (150 MHz, DMSO-*d*<sub>6</sub>) spectrum of *N*-aminoanthranilic acid (**11**)

## Mass Spectrum Molecular Formula Report

### Analysis Info

Analysis Name D:\Data\s.kankanamge\N\_aminoanthranilic acid\_2.d  
 Method tune-low\_AP.m  
 Sample Name N\_aminoanthranilic acid\_2  
 Comment

Acquisition Date 6/23/2021 3:46:59 PM  
 Operator a.salim  
 Instrument / Ser# micrOTOF 213750.00  
 232

### Acquisition Parameter

|             |            |                      |          |                  |           |
|-------------|------------|----------------------|----------|------------------|-----------|
| Source Type | ESI        | Ion Polarity         | Positive | Set Nebulizer    | 0.8 Bar   |
| Focus       | Not active |                      |          | Set Dry Heater   | 180 °C    |
| Scan Begin  | 100 m/z    | Set Capillary        | 4500 V   | Set Dry Gas      | 5.0 l/min |
| Scan End    | 1000 m/z   | Set End Plate Offset | -500 V   | Set Divert Valve | Source    |

### Generate Molecular Formula Parameter

|                  |                        |         |
|------------------|------------------------|---------|
| Formula, min.    |                        |         |
| Formula, max.    |                        |         |
| Measured m/z     | Tolerance              | Charge  |
| Check Valence    | Minimum                | Maximum |
| Nitrogen Rule    | Electron Configuration |         |
| Filter H/C Ratio | Minimum                | Maximum |
| Estimate Carbon  |                        |         |

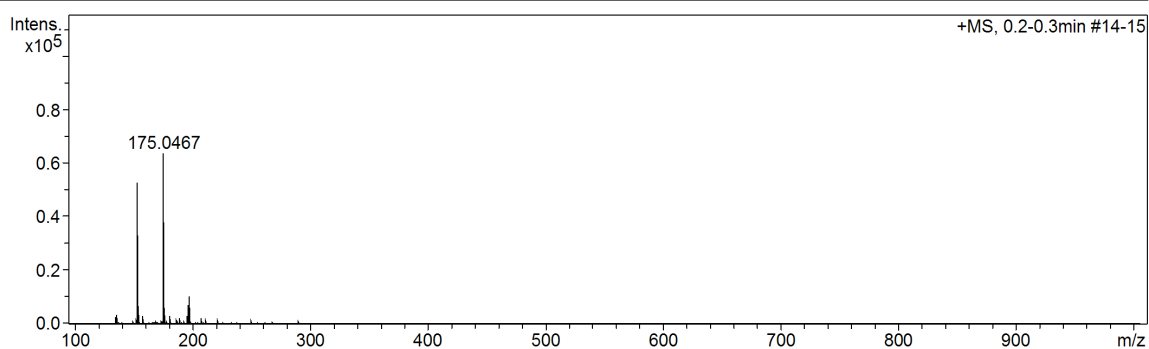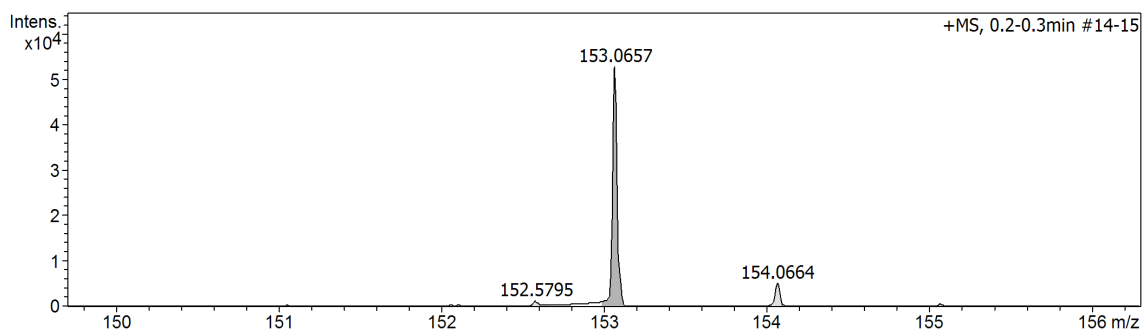

| Meas. m/z | # | Ion Formula | m/z      | err [ppm] | mSigma | # Sigma | Score  | rdb | e <sup>-</sup> Conf | N-Rule |
|-----------|---|-------------|----------|-----------|--------|---------|--------|-----|---------------------|--------|
| 153.0657  | 1 | C7H9N2O2    | 153.0659 | -1.3      | 8.0    | 1       | 100.00 | 4.5 | even                | ok     |
| 175.0467  | 1 | C7H8N2NaO2  | 175.0478 | 6.1       | 1.5    | 1       | 100.00 | 4.5 | even                | ok     |

**Figure S7.** HRMS for *N*-aminoanthranilic acid (**11**)

#### 4 Synthesis of penipacid A (6)

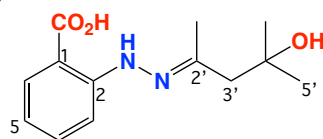

Penipacid A was synthesized by reacting *N*-aminoanthranilic acid (45 mg, 0.3 mmol.) with diacetone alcohol (0.3 mmol, 34.8 mg, 37.3  $\mu$ L). The reaction mixture was stirred for 5 min at room temperature. The crude product was purified using flash column chromatography (0-10% MeOH/DCM) to yield penipacid A in a quantitative yield as yellow oil;  $R_f$ : 0.52 (10% MeOH/DCM and the spot was visualized by UV at 254 nm). HRESI(+)-MS calculated for  $C_{13}H_{18}N_2O_3Na$  273.1210, found 273.1212.

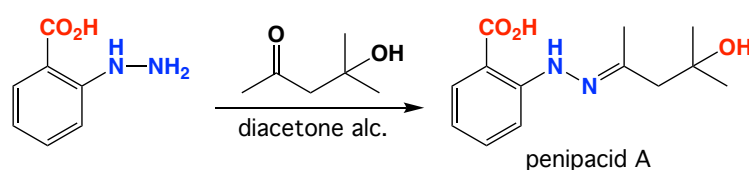

**Scheme S3.** Synthesis of penipacid A (6) from *N*-aminoanthranilic acid

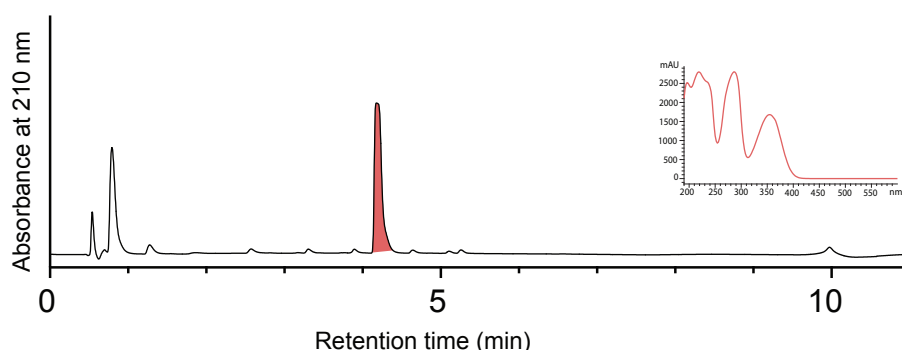

**Figure S8.** HPLC-DAD (210 nm) chromatogram for the purified penipacid A (highlighted peak, retention time 4.17 min) and UV vis spectrum inset using Agilent Zorbax SB-C<sub>8</sub> column (2.1  $\times$  150 mm, 3.5 mm) running 0.8 mL/min gradient elution from 90% H<sub>2</sub>O/MeCN to 100% MeCN (with constant 0.05% formic acid modifier) over 6.5 min.

**Table S1.** 1D NMR (600 MHz, CDCl<sub>3</sub>) data for penipacid A (6)

| Position            | penipacid A (6)                     |            | Reported penipacid A <sup>1</sup> (1) |            |
|---------------------|-------------------------------------|------------|---------------------------------------|------------|
|                     | $\delta_H$ , mult ( <i>J</i> in Hz) | $\delta_C$ | $\delta_H$ , mult ( <i>J</i> in Hz)   | $\delta_C$ |
| 1                   | -                                   | 108.4      | -                                     | 108.4      |
| 2                   | -                                   | 148.7      | -                                     | 148.3      |
| 3                   | 7.40, d (8.1)                       | 113.3      | 7.50, br d (8.2)                      | 113.1      |
| 4                   | 7.43, dd (8.1, 0.9)                 | 135.9      | 7.45, td (8.2, 1.0)                   | 135.7      |
| 5                   | 6.74, dd (8.0, 0.9)                 | 117.7      | 6.76, br t (7.9)                      | 117.5      |
| 6                   | 7.94, dd (8.0, 1.2)                 | 132.0      | 7.97, dd (7.9, 0.8)                   | 131.8      |
| 1'-CH <sub>3</sub>  | 1.97, s                             | 18.1       | 2.00, s                               | 17.9       |
| 2'                  | -                                   | 148.5      | -                                     | 148.4      |
| 3'                  | 2.50, s                             | 49.9       | 2.53, s                               | 49.7       |
| 4'                  | -                                   | 70.7       | -                                     | 70.8       |
| 5'-CH <sub>3</sub>  | 1.31, s                             | 29.7       | 1.35, s                               | 29.4       |
| 6'-CH <sub>3</sub>  | 1.31, s                             | 29.7       | 1.35, s                               | 29.4       |
| 1-CO <sub>2</sub> H | ND                                  | 172.6      | -                                     | 172.9      |
| 2-NH                | 10.59, s                            | -          | 10.63, s                              | -          |

\*ND not detected

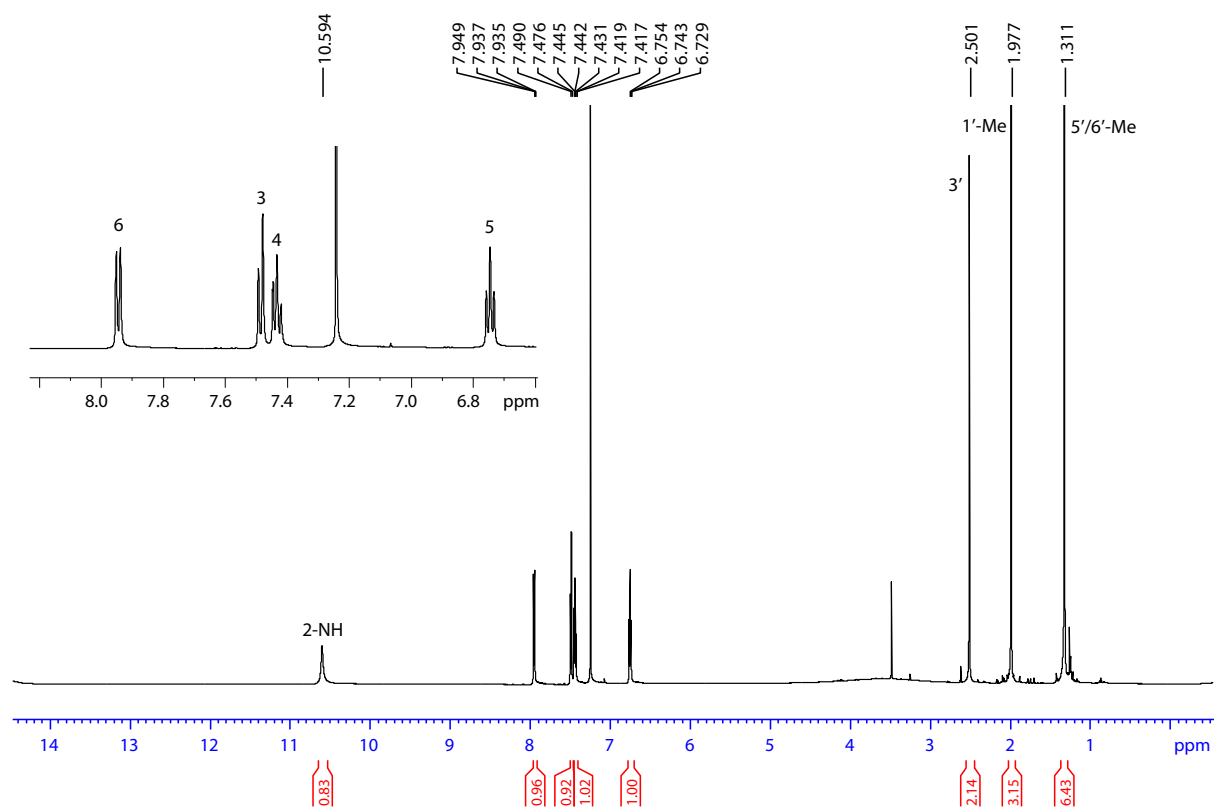

**Figure S9.**  $^1\text{H}$  NMR (600 MHz,  $\text{CDCl}_3$ ) for penipacid A (6)

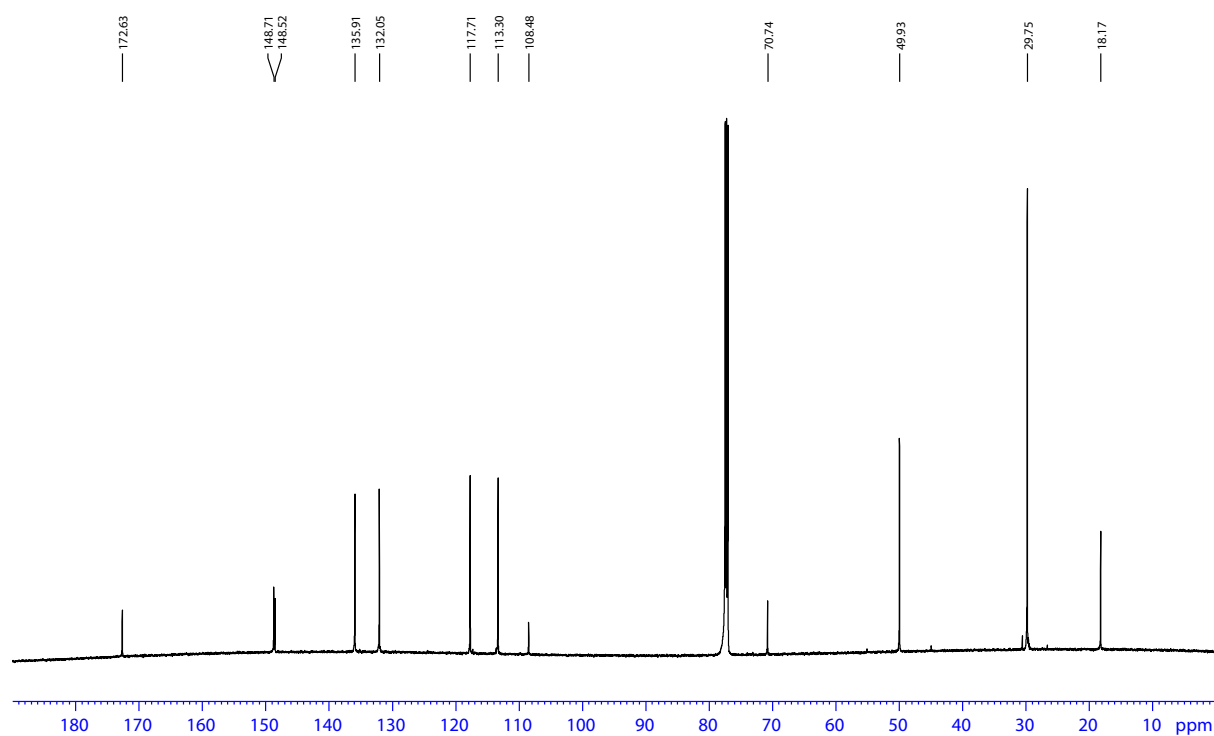

**Figure S10.**  $^{13}\text{C}$  (150 MHz,  $\text{CDCl}_3$ ) spectrum for penipacid A (6)

## Mass Spectrum Molecular Formula Report

### Analysis Info

Analysis Name D:\Data\s.kankanamge\penipacid\_A\_SP24\_25.d  
 Method tune-med\_AP.m  
 Sample Name penipacid\_A\_SP24\_25  
 Comment

Acquisition Date 9/15/2021 2:53:06 PM

Operator a.salim  
 Instrument / Ser# micrOTOF 213750.00  
 232

### Acquisition Parameter

|             |            |                      |          |                  |           |
|-------------|------------|----------------------|----------|------------------|-----------|
| Source Type | ESI        | Ion Polarity         | Positive | Set Nebulizer    | 0.8 Bar   |
| Focus       | Not active |                      |          | Set Dry Heater   | 180 °C    |
| Scan Begin  | 100 m/z    | Set Capillary        | 4500 V   | Set Dry Gas      | 5.0 l/min |
| Scan End    | 1000 m/z   | Set End Plate Offset | -500 V   | Set Divert Valve | Source    |

### Generate Molecular Formula Parameter

|                  |                        |         |
|------------------|------------------------|---------|
| Formula, min.    |                        |         |
| Formula, max.    |                        |         |
| Measured m/z     | Tolerance              | Charge  |
| Check Valence    | Minimum                | Maximum |
| Nitrogen Rule    | Electron Configuration |         |
| Filter H/C Ratio | Minimum                | Maximum |
| Estimate Carbon  |                        |         |

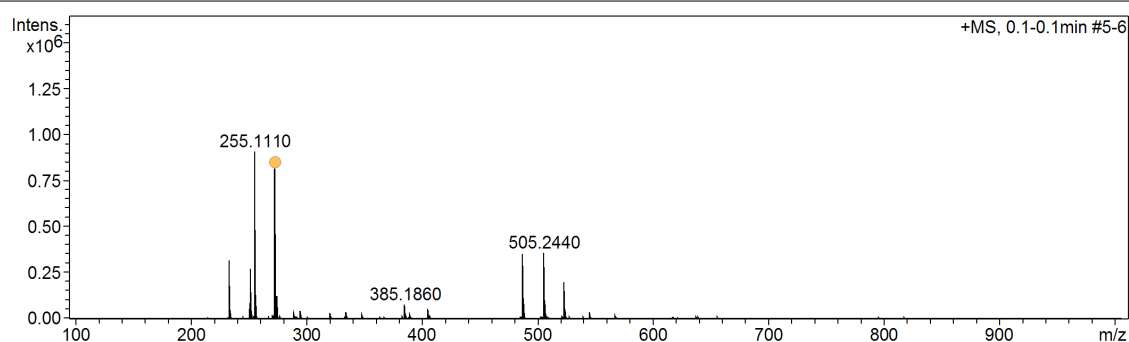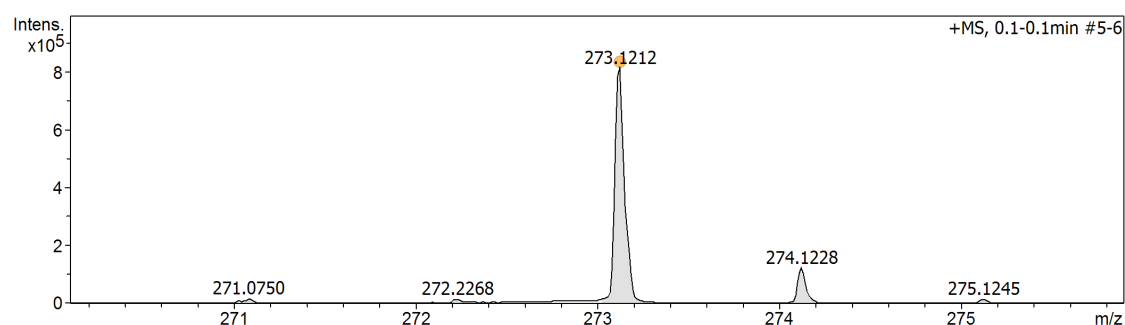

| Meas. m/z | # | Ion Formula                                                     | m/z      | err [ppm] | mSigma | # Sigma | Score  | rdb | e <sup>-</sup> Conf | N-Rule |
|-----------|---|-----------------------------------------------------------------|----------|-----------|--------|---------|--------|-----|---------------------|--------|
| 273.1212  | 1 | C <sub>13</sub> H <sub>18</sub> N <sub>2</sub> NaO <sub>3</sub> | 273.1210 | -1.0      | 1.5    | 1       | 100.00 | 5.5 | even                | ok     |

**Figure S11. HRMS for penipacid A (6)**

## 5 Synthesis of penipacid B (7)

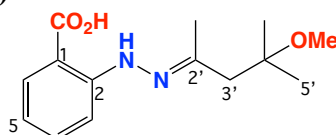

Penipacid B was synthesized by reacting *N*-aminoanthranilic acid (45 mg, 0.3 mmol) with diacetone alcohol methyl ether (0.3 mmol, 39 mg, 43.8  $\mu$ L). The reaction mixture was stirred for 5 min at room temperature. The reaction mixture (139 mg) was purified using the semi-preparative reversed phase HPLC (column Zorbax C<sub>8</sub> Eclipse, 9.4  $\times$  250 mm, 5  $\mu$ m, 65 % MeCN modified with 0.1% TFA, 3 mL/min isocratic, over 20 min) to yield penipacid B in a quantitative yield as yellow oil; *R*<sub>f</sub>: 0.61 (10% MeOH/DCM and the spot was visualized by UV at 254 nm). HRESI(+)-MS calculated for C<sub>14</sub>H<sub>20</sub>N<sub>2</sub>O<sub>3</sub>Na 287.1366, found 287.1371.

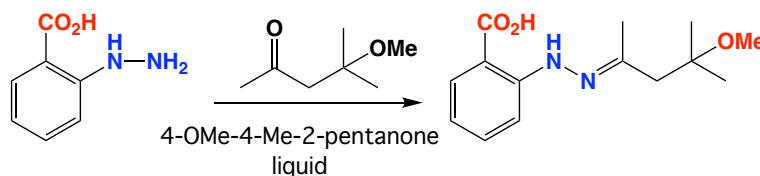

**Scheme S4.** Synthesis of penipacid B (7) from *N*-aminoanthranilic acid

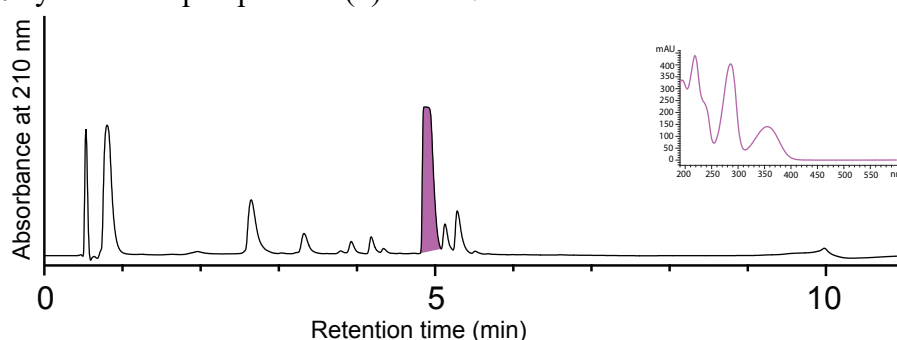

**Figure S12.** HPLC-DAD (210 nm) chromatogram for the purified penipacid B (highlighted peak) and UV vis spectrum inset, retention time 4.87 min using Agilent Zorbax SB-C<sub>8</sub> column (2.1  $\times$  150 mm, 3.5 mm) running 0.8 mL/min gradient elution from 90% H<sub>2</sub>O/MeCN to 100% MeCN (with constant 0.05% formic acid modifier) over 6.5 min.

**Table S2.** 1D NMR (600 MHz, methanol-*d*<sub>4</sub>) data for penipacid B (7)

| Position            | penipacid B (7)                              |                     | Reported penipacid B <sup>1</sup> (2)        |                     |
|---------------------|----------------------------------------------|---------------------|----------------------------------------------|---------------------|
|                     | $\delta_{\text{H}}$ , mult ( <i>J</i> in Hz) | $\delta_{\text{C}}$ | $\delta_{\text{H}}$ , mult ( <i>J</i> in Hz) | $\delta_{\text{C}}$ |
| 1                   | -                                            | 110.7               | -                                            | 111.1               |
| 2                   | -                                            | 149.8               | -                                            | 149.7               |
| 3                   | 7.58, d (8.5)                                | 114.2               | 7.58, br d (8.5)                             | 114.1               |
| 4                   | 7.39, dd (8.5, 1.4)                          | 135.9               | 7.38, td (8.5, 1.4)                          | 135.2               |
| 5                   | 6.74, dd (8.5, 1.1)                          | 118.0               | 6.70, br t (8.0)                             | 117.9               |
| 6                   | 7.89, br d (7.9)                             | 132.6               | 7.89, dd (8.0, 1.3)                          | 132.5               |
| 1'-CH <sub>3</sub>  | 1.97, s                                      | 17.4                | 1.97, s                                      | 17.3                |
| 2'                  | -                                            | 148.1               | -                                            | 147.9               |
| 3'                  | 2.53, s                                      | 49.1 <sup>a</sup>   | 2.53, s                                      | 48.7                |
| 4'                  | -                                            | 76.9                | -                                            | 76.8                |
| 5'-CH <sub>3</sub>  | 1.23, s                                      | 25.7                | 1.23, s                                      | 25.6                |
| 6'-CH <sub>3</sub>  | 1.23, s                                      | 25.7                | 1.23, s                                      | 25.6                |
| 1-CO <sub>2</sub> H | ND                                           | 172.1               | -                                            | 172.3               |
| 7'-OMe              | 3.28, s                                      | 49.8                | 3.27, s                                      | 49.0                |
| 2-NH                | ND                                           | -                   | -                                            | -                   |

\*ND not detected, <sup>a</sup> obscured by MeOH-*d*<sub>4</sub> signal

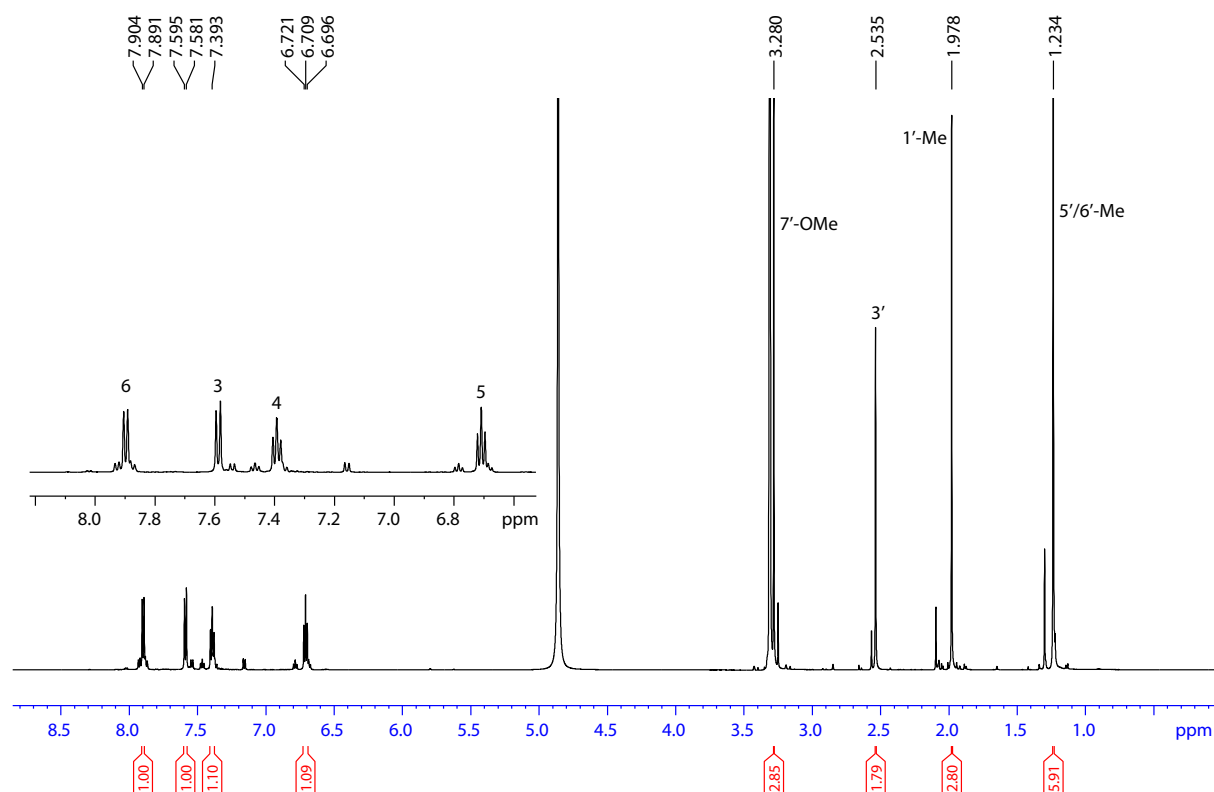

**Figure S13.** <sup>1</sup>H NMR (600 MHz, methanol-*d*<sub>4</sub>) for penicpacid B (7)

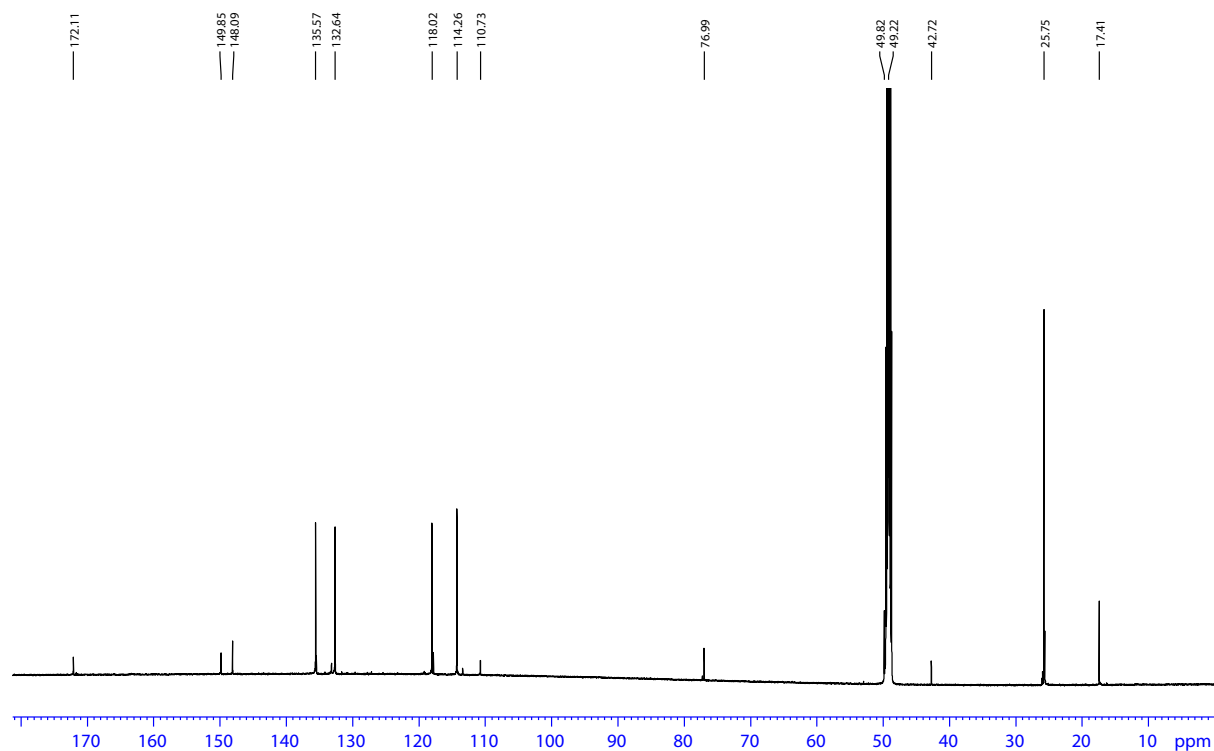

**Figure S14.** <sup>13</sup>C (150 MHz, methanol-*d*<sub>4</sub>) spectrum for penicpacid B (7)

## Mass Spectrum Molecular Formula Report

### Analysis Info

Analysis Name D:\Data\s.kankanamge\penipacid\_B\_SP13\_15.d  
 Method tune-med\_AP.m  
 Sample Name penipacid\_B\_SP13\_15  
 Comment

Acquisition Date 9/15/2021 2:20:38 PM

Operator a.salim  
 Instrument / Ser# microTOF 213750.00  
 232

### Acquisition Parameter

|             |            |                      |          |                  |           |
|-------------|------------|----------------------|----------|------------------|-----------|
| Source Type | ESI        | Ion Polarity         | Positive | Set Nebulizer    | 0.8 Bar   |
| Focus       | Not active |                      |          | Set Dry Heater   | 180 °C    |
| Scan Begin  | 100 m/z    | Set Capillary        | 4500 V   | Set Dry Gas      | 5.0 l/min |
| Scan End    | 1000 m/z   | Set End Plate Offset | -500 V   | Set Divert Valve | Source    |

### Generate Molecular Formula Parameter

|                  |                        |         |
|------------------|------------------------|---------|
| Formula, min.    |                        |         |
| Formula, max.    |                        |         |
| Measured m/z     | Tolerance              | Charge  |
| Check Valence    | Minimum                | Maximum |
| Nitrogen Rule    | Electron Configuration |         |
| Filter H/C Ratio | Minimum                | Maximum |
| Estimate Carbon  |                        |         |

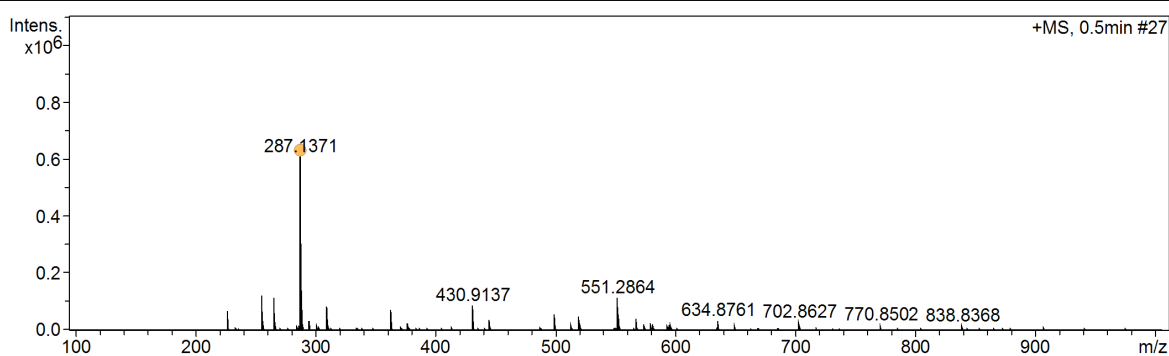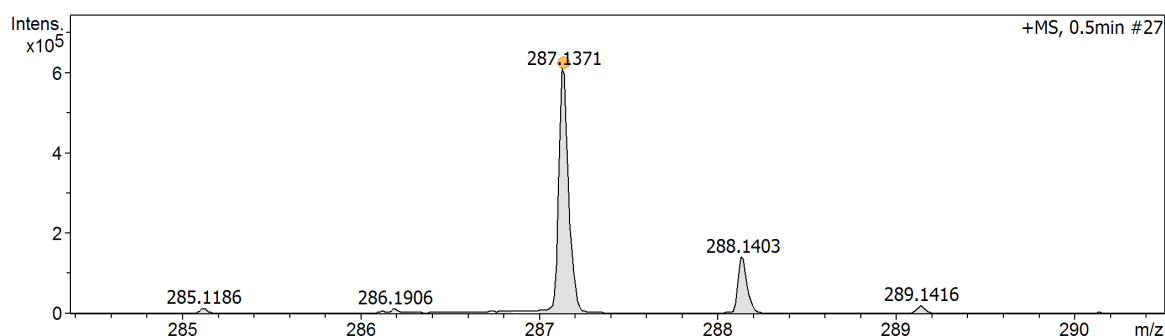

| Meas. m/z | # | Ion Formula                                                     | m/z      | err [ppm] | mSigma | # Sigma | Score  | rdb | e <sup>-</sup> Conf | N-Rule |
|-----------|---|-----------------------------------------------------------------|----------|-----------|--------|---------|--------|-----|---------------------|--------|
| 287.1371  | 1 | C <sub>14</sub> H <sub>20</sub> N <sub>2</sub> NaO <sub>3</sub> | 287.1366 | 1.8       | 39.8   | 1       | 100.00 | 5.5 | even                | ok     |

**Figure S15.** HRMS for penipacid B (7)



## 6 Synthesis of penipacid C (8)

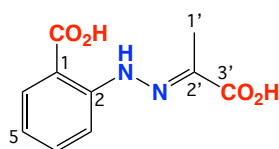

Penipacid C was synthesized by reacting *N*-aminoanthranilic acid (45 mg, 0.3 mmol) with pyruvic acid (0.2 mmol, 26 mg) in MeOH (200  $\mu$ L). The reaction mixture was stirred for 10 min at room temperature. The reaction mixture (70 mg) was purified using the semi-preparative reversed phase HPLC (column Zorbax C<sub>8</sub>, 9.4  $\times$  250 mm, 5  $\mu$ m, 0 - 55 % MeCN modified with 0.1% TFA, 3 mL/min, over 30 min) to yield penipacid C in a quantitative yield as yellow oil; *R<sub>f</sub>*: 0.43 (10% MeOH/DCM and the spot was visualized by UV at 254 nm). HRESI(+)-MS calculated for C<sub>10</sub>H<sub>10</sub>N<sub>2</sub>O<sub>4</sub>Na 245.0533, found 245.0539.

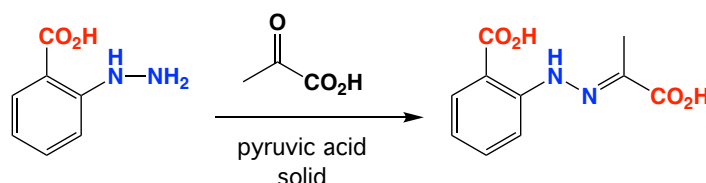

**Scheme S5.** Synthesis of penipacid C (8) from *N*-aminoanthranilic acid

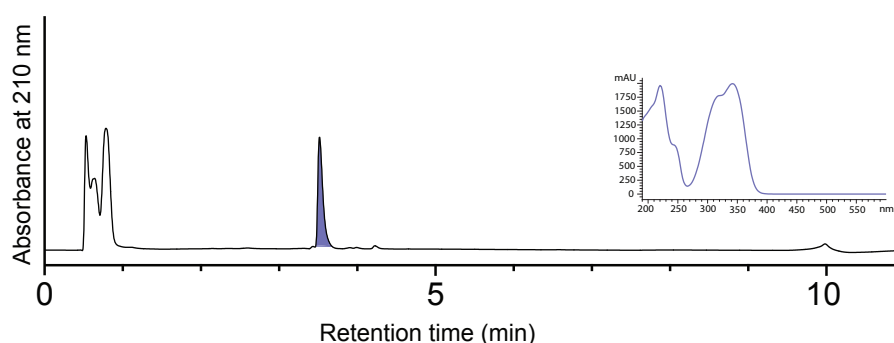

**Figure S16.** HPLC-DAD (210 nm) chromatogram for the purified penipacid C (highlighted peak) and UV vis spectrum inset, retention time 3.51 min using Agilent Zorbax SB-C<sub>8</sub> column (2.1  $\times$  150 mm, 3.5 mm) running 0.8 mL/min gradient elution from 90% H<sub>2</sub>O/MeCN to 100% MeCN (with constant 0.05% formic acid modifier) over 6.5 min.

**Table S3.** 1D NMR (600 MHz, DMSO-*d*<sub>6</sub>) data for penipacid C (8)

| Position             | penipacid C (8)                              |                     | Reported penipacid C <sup>1</sup> (3)        |                     |
|----------------------|----------------------------------------------|---------------------|----------------------------------------------|---------------------|
|                      | $\delta_{\text{H}}$ , mult ( <i>J</i> in Hz) | $\delta_{\text{C}}$ | $\delta_{\text{H}}$ , mult ( <i>J</i> in Hz) | $\delta_{\text{C}}$ |
| 1                    | -                                            | 112.4               | -                                            | 112.4               |
| 2                    | -                                            | 145.9               | -                                            | 146.4               |
| 3                    | 7.82, d (8.3)                                | 113.7               | 7.81, d (8.4)                                | 114.3               |
| 4                    | 7.54, dd (8.0, 1.4)                          | 134.3               | 7.55, t (7.4)                                | 135.0               |
| 5                    | 6.94, dd (7.9, 1.4)                          | 119.7               | 6.94, t (7.4)                                | 120.2               |
| 6                    | 7.90, dd (7.9, 1.4)                          | 131.1               | 7.89, d (7.9)                                | 131.6               |
| 1'-CH <sub>3</sub>   | 2.04, s                                      | 10.9                | 2.04, s                                      | 11.4                |
| 2'                   | -                                            | 135.7               | -                                            | 136.5               |
| 3'-CO <sub>2</sub> H | 12.38, br s                                  | 165.8               | NR                                           | 166.2               |
| 1-CO <sub>2</sub> H  | ND                                           | 169.9               | NR                                           | 170.4               |
| 2-NH                 | 11.49, s                                     | -                   | 11.36, s                                     | -                   |

\*ND not detected; NR not reported

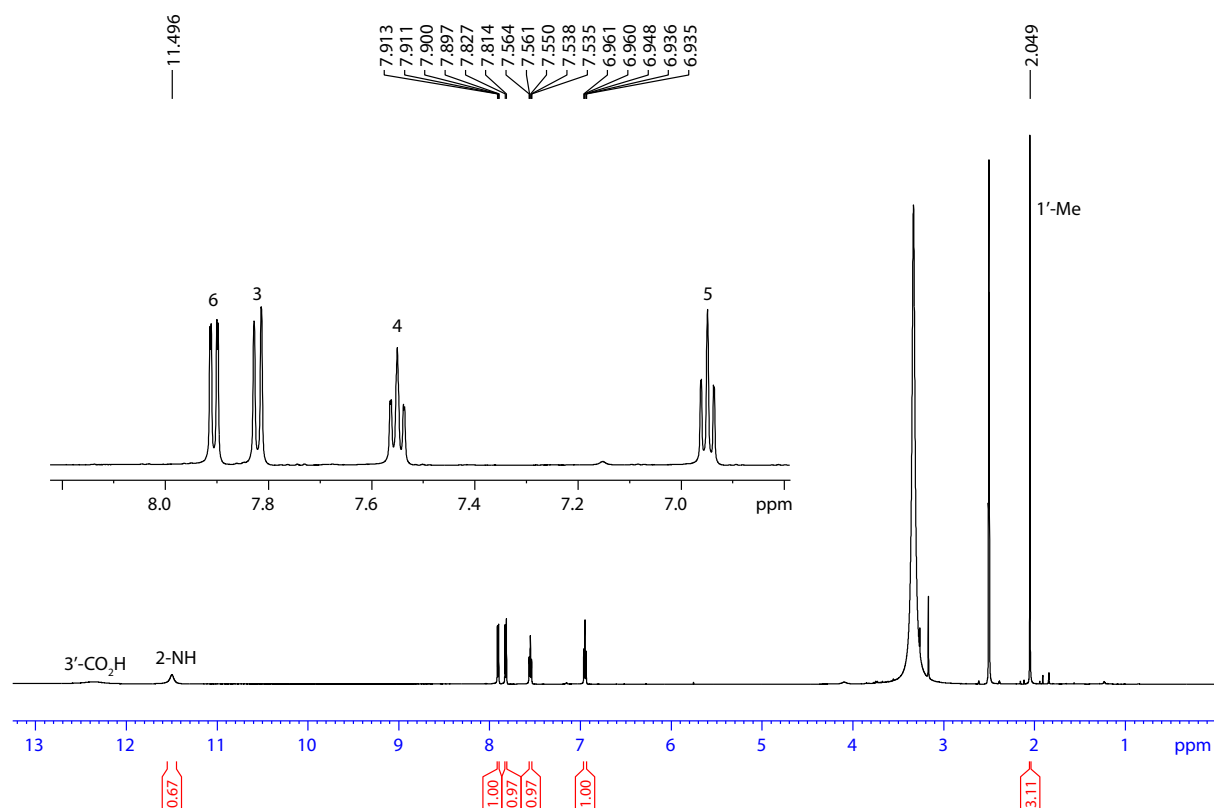

**Figure S17.** <sup>1</sup>H NMR (600 MHz, DMSO-*d*<sub>6</sub>) for penipacid C (**8**)

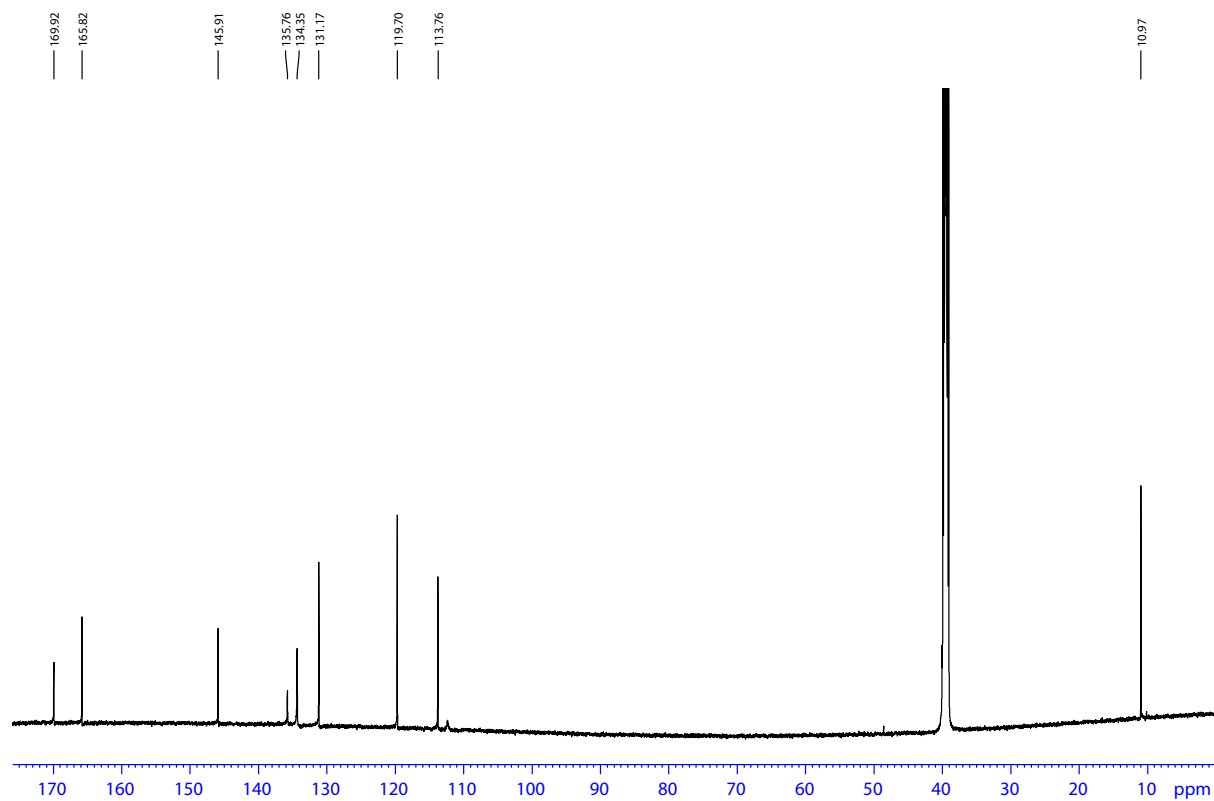

**Figure S18.** <sup>13</sup>C (150 MHz, DMSO-*d*<sub>6</sub>) for penipacid C (**8**)

# Mass Spectrum Molecular Formula Report

## Analysis Info

Analysis Name D:\Data\s.kankanamge\penipacid\_C\_SP16.d  
 Method tune-med\_AP.m  
 Sample Name penipacid\_C\_SP16  
 Comment

Acquisition Date 9/15/2021 2:27:29 PM

Operator a.salim  
 Instrument / Ser# micrOTOF 213750.00  
 232

## Acquisition Parameter

|             |            |                      |          |                  |           |
|-------------|------------|----------------------|----------|------------------|-----------|
| Source Type | ESI        | Ion Polarity         | Positive | Set Nebulizer    | 0.8 Bar   |
| Focus       | Not active |                      |          | Set Dry Heater   | 180 °C    |
| Scan Begin  | 100 m/z    | Set Capillary        | 4500 V   | Set Dry Gas      | 5.0 l/min |
| Scan End    | 1000 m/z   | Set End Plate Offset | -500 V   | Set Divert Valve | Source    |

## Generate Molecular Formula Parameter

|                  |                        |         |
|------------------|------------------------|---------|
| Formula, min.    |                        |         |
| Formula, max.    |                        |         |
| Measured m/z     | Tolerance              | Charge  |
| Check Valence    | Minimum                | Maximum |
| Nitrogen Rule    | Electron Configuration |         |
| Filter H/C Ratio | Minimum                | Maximum |
| Estimate Carbon  |                        |         |

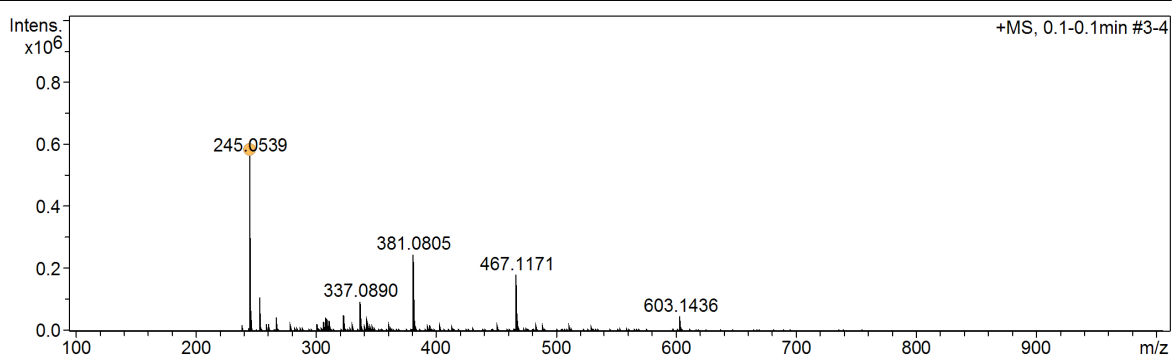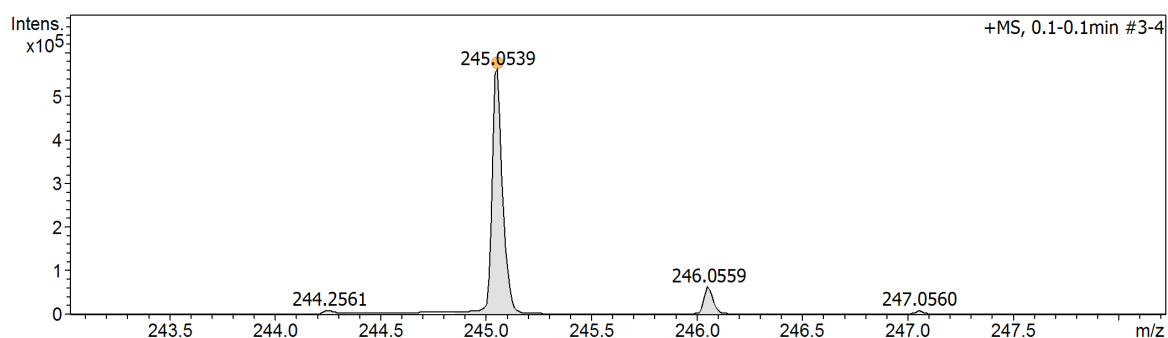

| Meas. m/z | # | Ion Formula  | m/z      | err [ppm] | mSigma | # Sigma | Score  | rdb  | e <sup>-</sup> Conf | N-Rule |
|-----------|---|--------------|----------|-----------|--------|---------|--------|------|---------------------|--------|
| 245.0539  | 1 | C10H10N2NaO4 | 245.0533 | -2.4      | 3.0    | 1       | 100.00 | 6.5  | even                | ok     |
|           | 2 | C11H6N6Na    | 245.0546 | -3.1      | 16.9   | 2       | 70.88  | 11.5 | even                | ok     |

**Figure S19.** HRMS for penipacid C (8)

## 7 Synthesis of penipacid D (9)

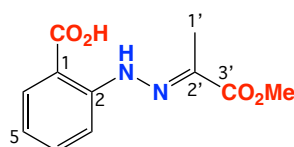

Penipacid D was synthesized by reacting *N*-aminoanthranilic acid (45 mg, 0.3 mmol) with methyl pyruvate (0.3 mmol, 30.6 mg, 27  $\mu$ L). The reaction mixture was stirred for 10 min at room temperature. The reaction mixture (102 mg) was purified using the semi-preparative reversed phase HPLC (column Zorbax C<sub>8</sub>, 9.4  $\times$  250 mm, 5  $\mu$ m, 0 - 60 % MeCN modified with 0.1% TFA, 3 mL/min, over 30 min) to yield penipacid D in a quantitative yield as yellow oil; *R*<sub>f</sub>: 0.29 (10% MeOH/DCM and the spot was visualized by UV at 254 nm). HRESI(+)-MS calculated for C<sub>11</sub>H<sub>12</sub>N<sub>2</sub>O<sub>4</sub>Na 259.0689, found 259.0696.

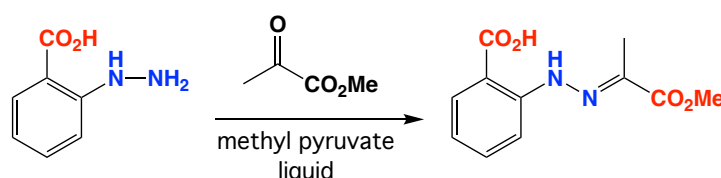

**Scheme S6.** Synthesis of penipacid D (9) from *N*-aminoanthranilic acid

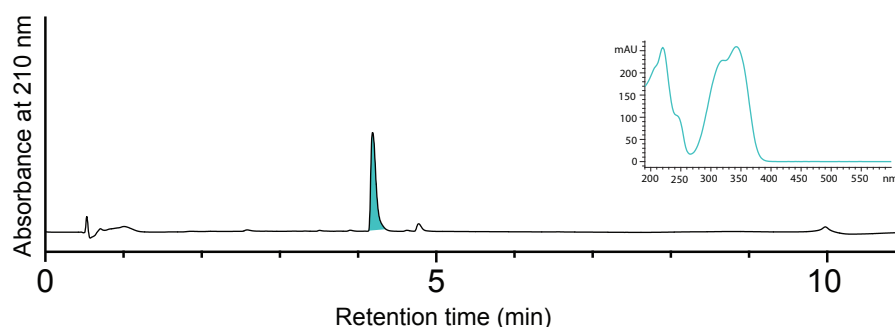

**Figure S20.** HPLC-DAD (210 nm) chromatogram for the purified penipacid D (highlighted peak) and UV vis spectrum inset, retention time 4.18 min using Agilent Zorbax SB-C<sub>8</sub> column (2.1  $\times$  150 mm, 3.5 mm) running 0.8 mL/min gradient elution from 90% H<sub>2</sub>O/MeCN to 100% MeCN (with constant 0.05% formic acid modifier) over 6.5 min.

**Table S4.** 1D NMR (600 MHz, methanol-*d*<sub>4</sub>) data for penipacid D (9)

| Position              | penipacid D (9)                              |                     | Reported penipacid D <sup>1</sup> (4)        |                     |
|-----------------------|----------------------------------------------|---------------------|----------------------------------------------|---------------------|
|                       | $\delta_{\text{H}}$ , mult ( <i>J</i> in Hz) | $\delta_{\text{C}}$ | $\delta_{\text{H}}$ , mult ( <i>J</i> in Hz) | $\delta_{\text{C}}$ |
| 1                     | -                                            | 113.9               | -                                            | 112.1               |
| 2                     | -                                            | 147.7               | -                                            | 147.5               |
| 3                     | 7.82, d (8.4)                                | 115.2               | 7.80, d (8.4)                                | 115.0               |
| 4                     | 7.50, dd (8.4, 1.2)                          | 135.5               | 7.48, t (7.5)                                | 135.0               |
| 5                     | 6.94, dd (7.9, 1.1)                          | 121.1               | 6.93, t (7.5)                                | 121.0               |
| 6                     | 7.98, dd (7.8, 1.1)                          | 132.6               | 7.98, d (7.7)                                | 132.6               |
| 1'-CH <sub>3</sub>    | 2.13, s                                      | 11.5                | 2.14, s                                      | 11.4                |
| 2'                    | -                                            | 135.9               | -                                            | 135.4               |
| 3'-CO <sub>2</sub> Me | -                                            | 167.4               | -                                            | 167.4               |
| 3'-CO <sub>2</sub> Me | 3.84, s                                      | 52.8                | NR                                           | 52.7                |
| 1-CO <sub>2</sub> H   | -                                            | 172.1               | -                                            | 172.7               |
| 2-NH                  | -                                            | -                   | -                                            | -                   |

\*NR not reported

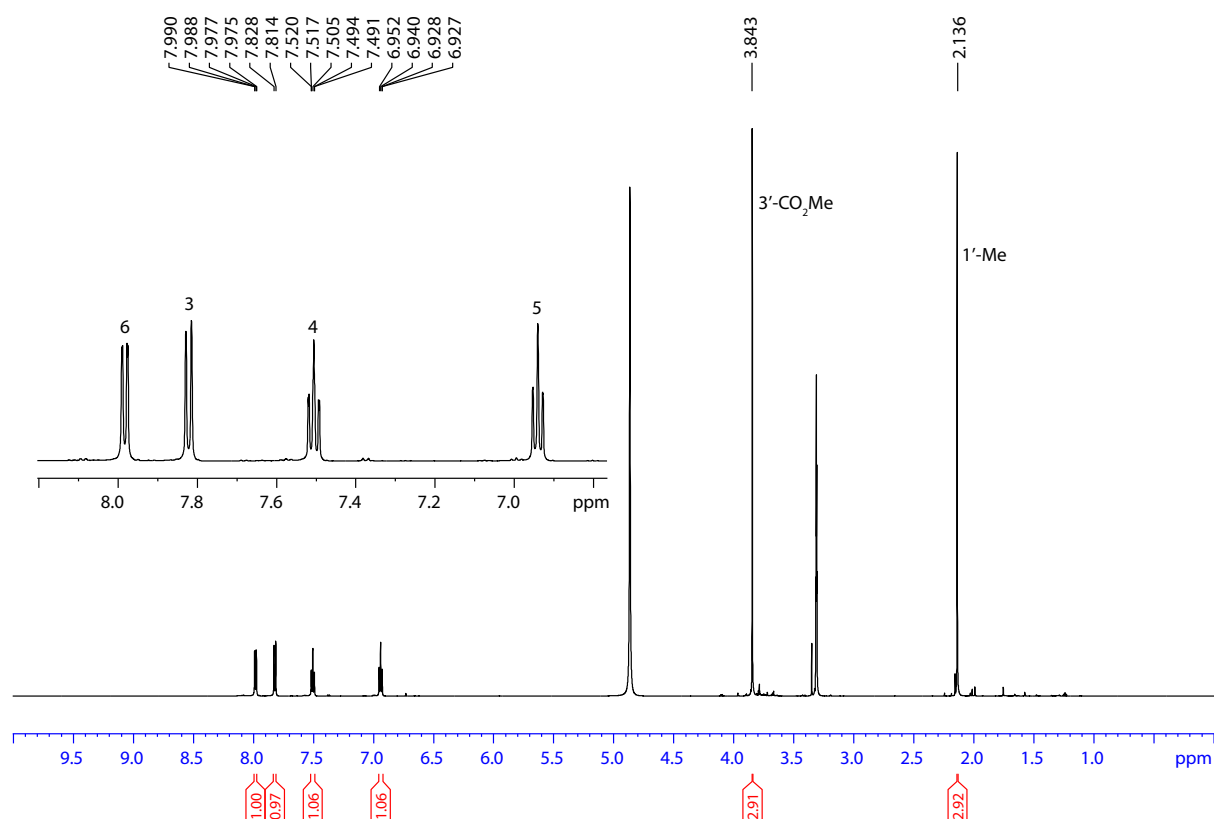

**Figure S21.** <sup>1</sup>H NMR (600 MHz, methanol-*d*<sub>4</sub>) for penipacid D (9)

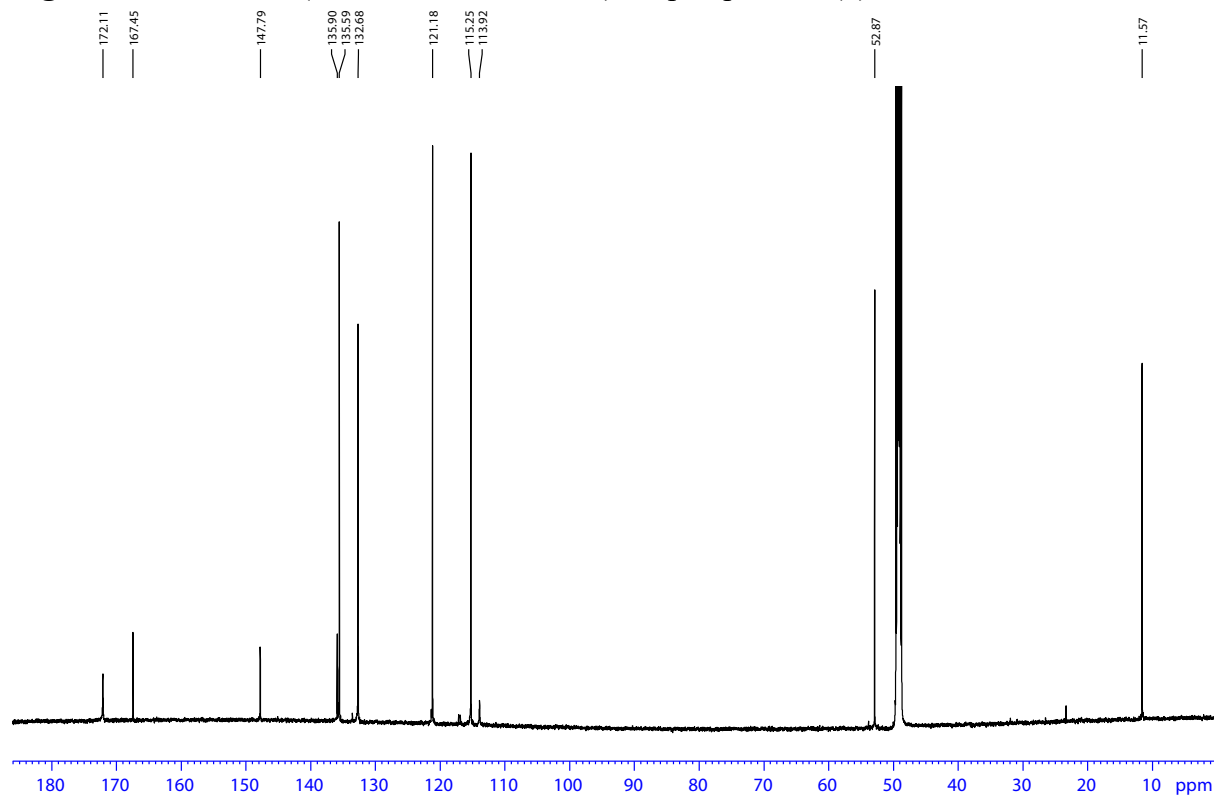

**Figure S22.** <sup>13</sup>C (150 MHz, methanol-*d*<sub>4</sub>) for penipacid D (9)

# Mass Spectrum Molecular Formula Report

## Analysis Info

Analysis Name D:\Data\s.kankanamge\penipacid\_E\_SP8.d  
 Method tune-med\_AP.m  
 Sample Name penipacid\_E\_SP8  
 Comment

Acquisition Date 9/15/2021 2:34:25 PM

Operator a.salim  
 Instrument / Ser# micrOTOF 213750.00  
 232

## Acquisition Parameter

|             |            |                      |          |                  |           |
|-------------|------------|----------------------|----------|------------------|-----------|
| Source Type | ESI        | Ion Polarity         | Positive | Set Nebulizer    | 0.8 Bar   |
| Focus       | Not active |                      |          | Set Dry Heater   | 180 °C    |
| Scan Begin  | 100 m/z    | Set Capillary        | 4500 V   | Set Dry Gas      | 5.0 l/min |
| Scan End    | 1000 m/z   | Set End Plate Offset | -500 V   | Set Divert Valve | Source    |

## Generate Molecular Formula Parameter

|                  |                        |         |
|------------------|------------------------|---------|
| Formula, min.    |                        |         |
| Formula, max.    |                        |         |
| Measured m/z     |                        |         |
| Check Valence    | Tolerance              | Charge  |
| Nitrogen Rule    | Minimum                | Maximum |
| Filter H/C Ratio | Electron Configuration |         |
| Estimate Carbon  | Minimum                | Maximum |

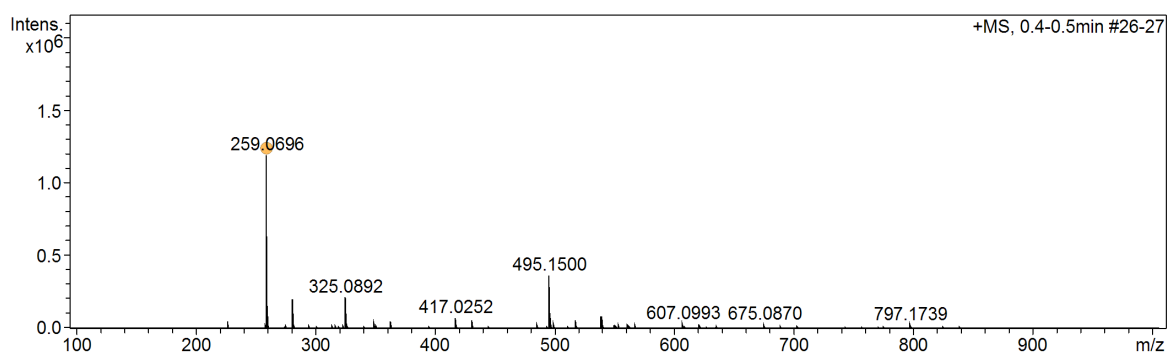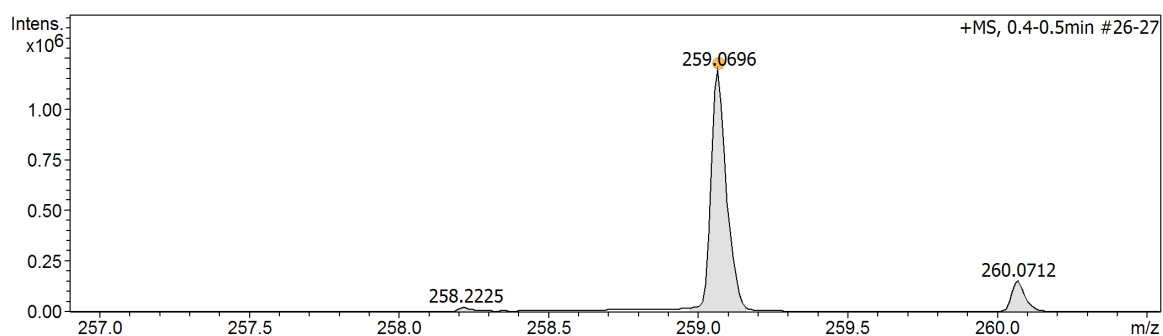

| Meas. m/z | # | Ion Formula  | m/z      | err [ppm] | mSigma | # Sigma | Score  | rdb  | e <sup>-</sup> Conf | N-Rule |
|-----------|---|--------------|----------|-----------|--------|---------|--------|------|---------------------|--------|
| 259.0696  | 1 | C11H12N2NaO4 | 259.0689 | 2.6       | 1.6    | 1       | 100.00 | 6.5  | even                | ok     |
|           | 2 | C12H8N6Na    | 259.0703 | -2.6      | 15.1   | 2       | 78.84  | 11.5 | even                | ok     |

Figure S23. HRMS for penipacid D (9)

## 8 Synthesis of penipacid E (10)

Penipacid E was synthesized by reacting *N*-aminoanthranilic acid (45 mg, 0.3 mmol, 1 eq) with furfural (0.6 mmol, 40 mg, 50  $\mu$ L, 2 eq). The reaction mixture was stirred for 10 min at room temperature. The reaction mixture (93 mg) was purified using the semi-preparative reversed phase HPLC (column Zorbax Phenyl, 9.4  $\times$  250 mm, 5  $\mu$ m, 0 - 65 % MeCN modified with 0.1% TFA, 3 mL/min, over 30 min), to yield penipacid E as yellow oil (0.05 mg, 0.07 %); *R*<sub>f</sub>: 0.4 (10% MeOH/DCM and the spot was visualized by UV at 254 nm). HRESI(+)-MS calculated for C<sub>12</sub>H<sub>10</sub>N<sub>2</sub>O<sub>3</sub>Na 2593.0584, found 259.0579.

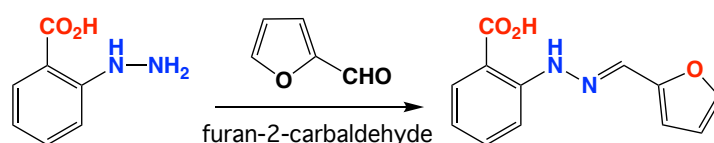

**Scheme S7.** Synthesis of penipacid E (10) from *N*-aminoanthranilic acid

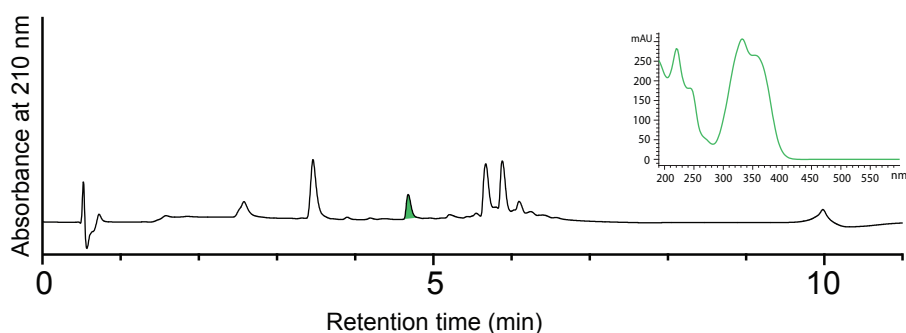

**Figure S24.** HPLC-DAD (210 nm) chromatogram for the reaction mixture of penipacid E (highlighted peak) and UV vis spectrum inset, retention time 4.67 min using Agilent Zorbax SB-C<sub>8</sub> column (2.1  $\times$  150 mm, 3.5 mm) running 0.8 mL/min gradient elution from 90% H<sub>2</sub>O/MeCN to 100% MeCN (with constant 0.05% formic acid modifier) over 6.5 min.

## Mass Spectrum Molecular Formula Report

### Analysis Info

Analysis Name D:\Data\s.kankanamge\penipacid\_G\_SP15.d  
 Method tune-med\_AP.m  
 Sample Name penipacid\_G\_SP15  
 Comment

Acquisition Date 9/15/2021 2:50:26 PM

Operator a.salim  
 Instrument / Ser# micrOTOF 213750.00  
 232

### Acquisition Parameter

|             |            |                      |          |                  |           |
|-------------|------------|----------------------|----------|------------------|-----------|
| Source Type | ESI        | Ion Polarity         | Positive | Set Nebulizer    | 0.8 Bar   |
| Focus       | Not active |                      |          | Set Dry Heater   | 180 °C    |
| Scan Begin  | 100 m/z    | Set Capillary        | 4500 V   | Set Dry Gas      | 5.0 l/min |
| Scan End    | 1000 m/z   | Set End Plate Offset | -500 V   | Set Divert Valve | Source    |

### Generate Molecular Formula Parameter

|                  |                        |         |
|------------------|------------------------|---------|
| Formula, min.    |                        |         |
| Formula, max.    |                        |         |
| Measured m/z     | Tolerance              | Charge  |
| Check Valence    | Minimum                | Maximum |
| Nitrogen Rule    | Electron Configuration |         |
| Filter H/C Ratio | Minimum                | Maximum |
| Estimate Carbon  |                        |         |

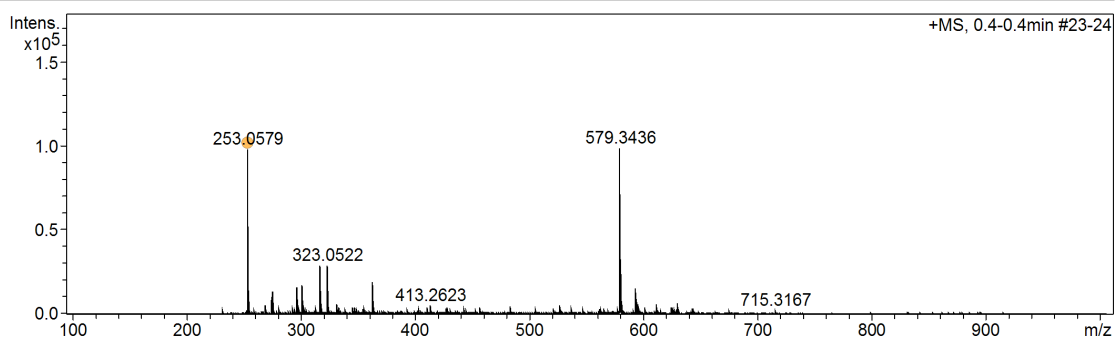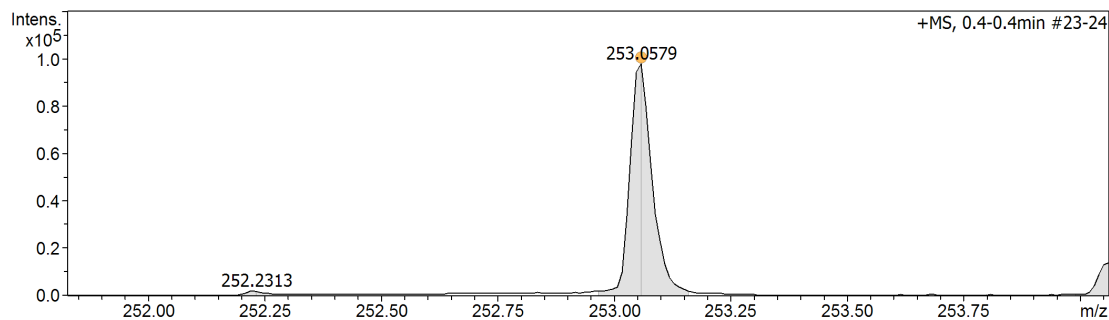

| Meas. m/z | # | Ion Formula                                                     | m/z      | err [ppm] | mSigma | # Sigma | Score  | rdb | e <sup>-</sup> Conf | N-Rule |
|-----------|---|-----------------------------------------------------------------|----------|-----------|--------|---------|--------|-----|---------------------|--------|
| 253.0579  | 1 | C <sub>12</sub> H <sub>10</sub> N <sub>2</sub> NaO <sub>3</sub> | 253.0584 | -2.0      | 2.8    | 1       | 100.00 | 8.5 | even                | ok     |

**Figure S25.** HRMS for penipacid E (10)



## 9 Biological assays

### 9.1 Antibacterial and antifungal assays

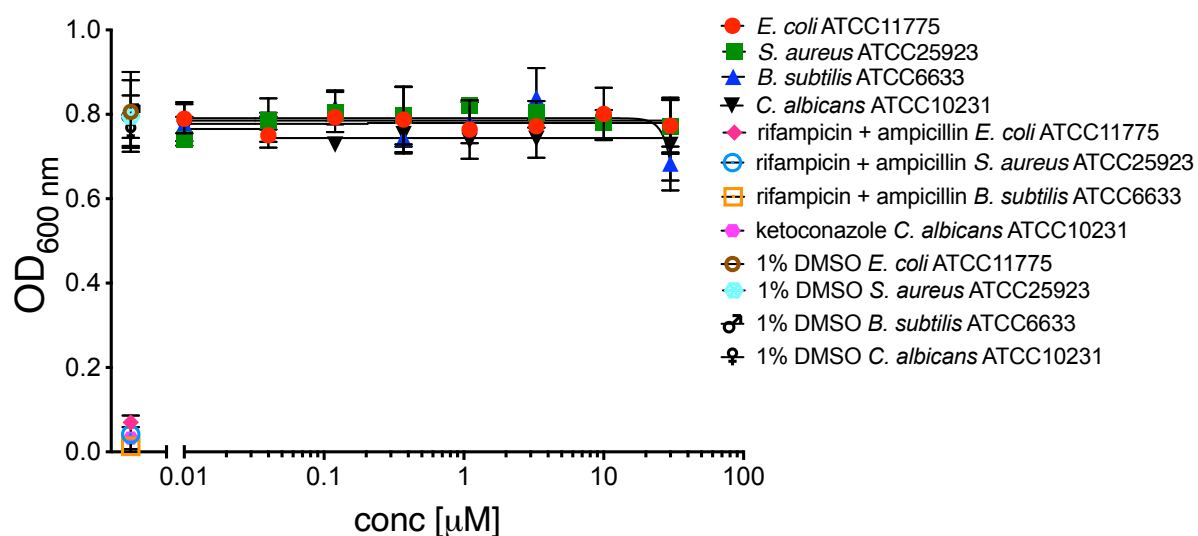

**Figure S26.** Growth inhibitory activity of *N*-aminoanthranilic acid

### 9.2 Cytotoxicity (MTT) assay

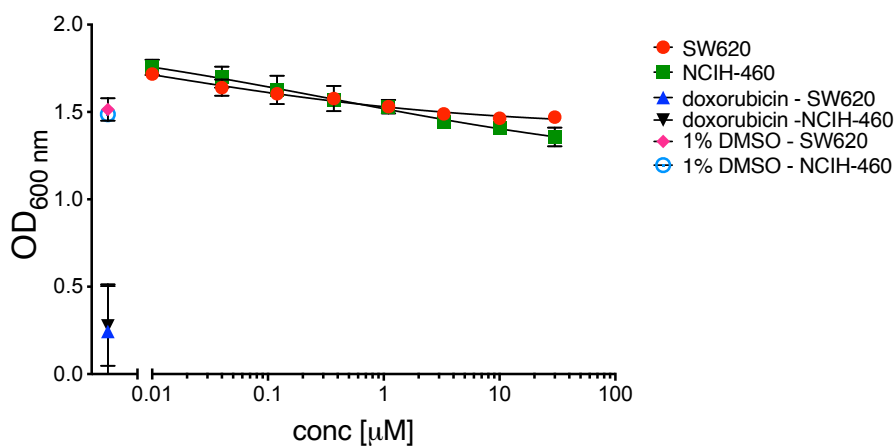

**Figure S27.** Cytotoxicity of *N*-aminoanthranilic acid against SW620 and NCIH-460. Doxorubicin and 1%DMSO served as positive and negative controls respectively.

**Table S5.** List of bacterial strains for the activation trials

| Strains   | Taxonomy                        | Cultivation medium |
|-----------|---------------------------------|--------------------|
| CMB-M0139 | Unspecified                     | M1 + 3.3% sea salt |
| CMB-CA059 | <i>Streptomyces platensis</i>   | IMA                |
| CMB-CA091 | <i>Streptomyces virginiae</i>   | IMA                |
| CMB-PB041 | <i>Streptomyces sp.</i>         | ISP2               |
| CMB-PB042 | <i>Streptomyces sp.</i>         | ISP2               |
| ACM-4200  | <i>Streptomyces hawaiiensis</i> | ISP2               |
| ACM-4361  | <i>Streptomyces sampsonii</i>   | ISP2               |
| ACM-4129  | <i>Streptomyces eurythermus</i> | ISP2               |
| ACM-4105  | <i>Streptomyces corchorusii</i> | ISP2               |
| ACM-4477  | <i>Streptomyces spectabilis</i> | ISP2               |
| ACM-4279  | <i>Streptomyces niveus</i>      | ISP2               |

**Table S6.** List of fungal strains for the activation trials

| Strains    | Taxonomy                  | Cultivation medium |
|------------|---------------------------|--------------------|
| CMB-GO296  | Unspecified               | SDB                |
| CMB-W003   | Unspecified               | SDB                |
| CMB-GO014  | Unspecified               | IMA                |
| CMB-GO008  | Unspecified               | ISP2               |
| CMB-M0339  | <i>Aspergillus sp.</i>    | D400               |
| CMB-NF091  | <i>Talaromyces sp.</i>    | YEME               |
| S4S-00182  | Unspecified               | ISP2               |
| CMB-MRF324 | <i>Aspergillus sp.</i>    | SDB                |
| CMB-F458   | <i>Scopulariopsis sp.</i> | M1 + 3.3% sea salt |
| CMB-MD22   | <i>Penicillium sp.</i>    | ISP2               |
| CMB-MD14   | <i>Penicillium sp.</i>    | ISP2               |

## 10 References

1. Li, C.-S.; Li, X.-M.; Gao, S.-S.; Lu, Y.H.; Wang, B.-G. Cytotoxic anthranilic acid derivatives from deep sea sediment-derived fungus *Penicillium paneum* SD-44. *Mar. Drugs* **2013**, *11*, 3068–3076.
2. Dang, T.; Suchy, M.; Truong, Y.J.; Oakden, W.; Lam, W.W.; Lazurko, C.; Facey, G.; Stanis, G.J.; Shuhendler, A.J. Hydrazo-CEST: Hydrazone-dependent chemical exchange saturation transfer magnetic resonance imaging contrast agents. *Chem. Eur. J.* **2018**, *24*, 9148–9156.
